# Notch Signaling in Development and Cancer

Victoria Bolós, Joaquín Grego-Bessa, and José Luis de la Pompa

Departamento de Inmunología y Oncología, Centro Nacional de Biotecnología/Consejo Superior de Investigaciones Científicas, E-28049 Madrid, Spain

**Notch is an evolutionarily conserved local cell signaling mechanism that participates in a variety of cellular processes: cell fate specification, differentiation, proliferation, apoptosis, adhesion, epithelial-mesenchymal transition, migration, and angiogenesis. These processes can be subverted in Notch-mediated pathological situations. In the first part of this review, we will discuss the role of Notch in vertebrate central nervous system development, somitogenesis, cardiovascular and endocrine development, with attention to the mechanisms by which Notch regulates cell fate specification and patterning in these tissues.**

**In the second part, we will review the molecular aspects of Notch-mediated neoplasias, where Notch can act as an oncogene or as a tumor suppressor. From all these studies, it becomes evident that the outcome of Notch signaling is strictly context-dependent and differences in the strength, timing, cell type, and context of the signal may affect the final outcome. It is essential to understand how Notch integrates inputs from other signaling pathways and how specificity is achieved, because this knowledge may be relevant for future therapeutic applications. (Endocrine Reviews 28: 339–363, 2007)**

- I. Introduction: Elements of the Notch Signaling Pathway
- II. Notch in Vertebrate CNS Development
  - A. Notch promotes progenitor diversification and inhibits neuronal differentiation
  - B. Notch in gliogenesis
- III. Notch in Somitogenesis
- IV. Notch in Cardiovascular Development and Homeostasis
- V. Notch in Endocrine Development: Pancreas, Gut, and Bone Endocrine Cells
  - A. Pancreatic development
  - B. Gut development
  - C. Bone development
- VI. Notch in Cancer
  - A. Notch in hematological tumors
  - B. Notch as an oncogene in solid tumors: breast and gut cancer
  - C. Differential roles of NOTCH in two types of skin cancer: keratinocyte-derived carcinoma and melanomas
  - D. Notch in EMT and tumor progression
- VII. Concluding Remarks

## I. Introduction: Elements of the Notch Signaling Pathway

**N**OTCH IS ONE of the fundamental signaling pathways that regulate metazoan development and adult tissue homeostasis. The Notch mutant was initially described in

*Drosophila*, based on its dominant wing-notching phenotype (1). The study of the embryonic lethal phenotype caused by complete lack of Notch function (2) and its complex allelic series and genetic interactions (3) brought Notch to the forefront, so that in the mid-1980s the *Drosophila* Notch gene product was identified (4, 5).

Notch is a local signaling mechanism that is evolutionarily conserved throughout the animal kingdom. Mammals have four Notch proteins (Notch 1–4; Refs. 6–10 and Fig. 1A) that are membrane-bound type I receptors (with a single-pass transmembrane domain), harboring a large extracellular domain involved in ligand binding, and a cytoplasmic domain involved in signal transduction. The extracellular domain contains a variable number of epidermal growth factor (EGF)-like repeats that are critical for binding interactions (11, 12). The EGF-like repeats are followed by three cysteine-rich LIN12/Notch repeats (LNR) that prevent signaling in the absence of the ligand. The Notch intracellular domain (NICD) contains a RAM23 domain (13), six ankyrin/cdc10 repeats involved in protein-protein interactions (14), two nuclear localization signals (N1 and N2), a transcriptional activation domain (TAD) that differs among the four receptors, and a PEST sequence [rich in proline (P), glutamic acid (E), serine (S) and threonine (T)] that negatively regulates protein stability (15).

The Notch receptors are synthesized as single precursor proteins that are cleaved by a furin-convertase activity (16) at site 1 or S1 (Fig. 1B) during transport to the cell surface, where they are expressed as heterodimers (17). The mammalian Notch ligands Delta1 (18), Delta3 (19), Delta4 (20), Jagged1 (21), and Jagged2 (22) are named after the *Drosophila* homologs Delta and Serrate, respectively, and are also membrane-bound. They have an amino-terminal domain termed DSL (for Delta, Serrate and LAG-2 domain), followed by a variable number of EGF-like repeats. In addition, Jagged1 and Jagged2 harbor a cysteine-rich domain (CR; Fig. 1A).

Notch signaling is regulated by posttranslational modification events, such as glycosylation, and by other modifications involving the extracellular domains of both receptors and ligands, such as the extension of sugar residues by the

### First Published Online April 4, 2007

Abbreviations: A-P, Anterior-posterior; bHLH, basic helix-loop-helix; CNS, central nervous system; CoR, corepressor; CR, cysteine-rich domain; DSL, Delta, Serrate and LAG-2 domain; E, embryonic day; EGF, epidermal growth factor; EMT, epithelial-mesenchyme transition; FGF10, fibroblast growth factor 10; HNSCC, head and neck SCC; HSC, hematopoietic stem cell; Lfng, lunatic fringe; LNR, LIN12/Notch repeats; MAN, Mastermind-Like 1; MMTV, mouse mammary tumor virus; NICD, Notch intracellular domain; PAE, porcine aortic endothelial; PEST, sequence rich in proline (P), glutamic acid (E), serine (S) and threonine (T); PKA, protein kinase A; PPR, PTH/PTHrP receptor; PSM, presomitic mesoderm; SCC, squamous cell carcinoma; Shh, sonic hedgehog; TACE, TNF- $\alpha$ -converting-enzyme; TAD, transcriptional activation domain; T-ALL, T cell acute lymphoblastic leukemia; WAP, whey acidic protein.

*Endocrine Reviews* is published by The Endocrine Society (<http://www.endo-society.org>), the foremost professional society serving the endocrine community.

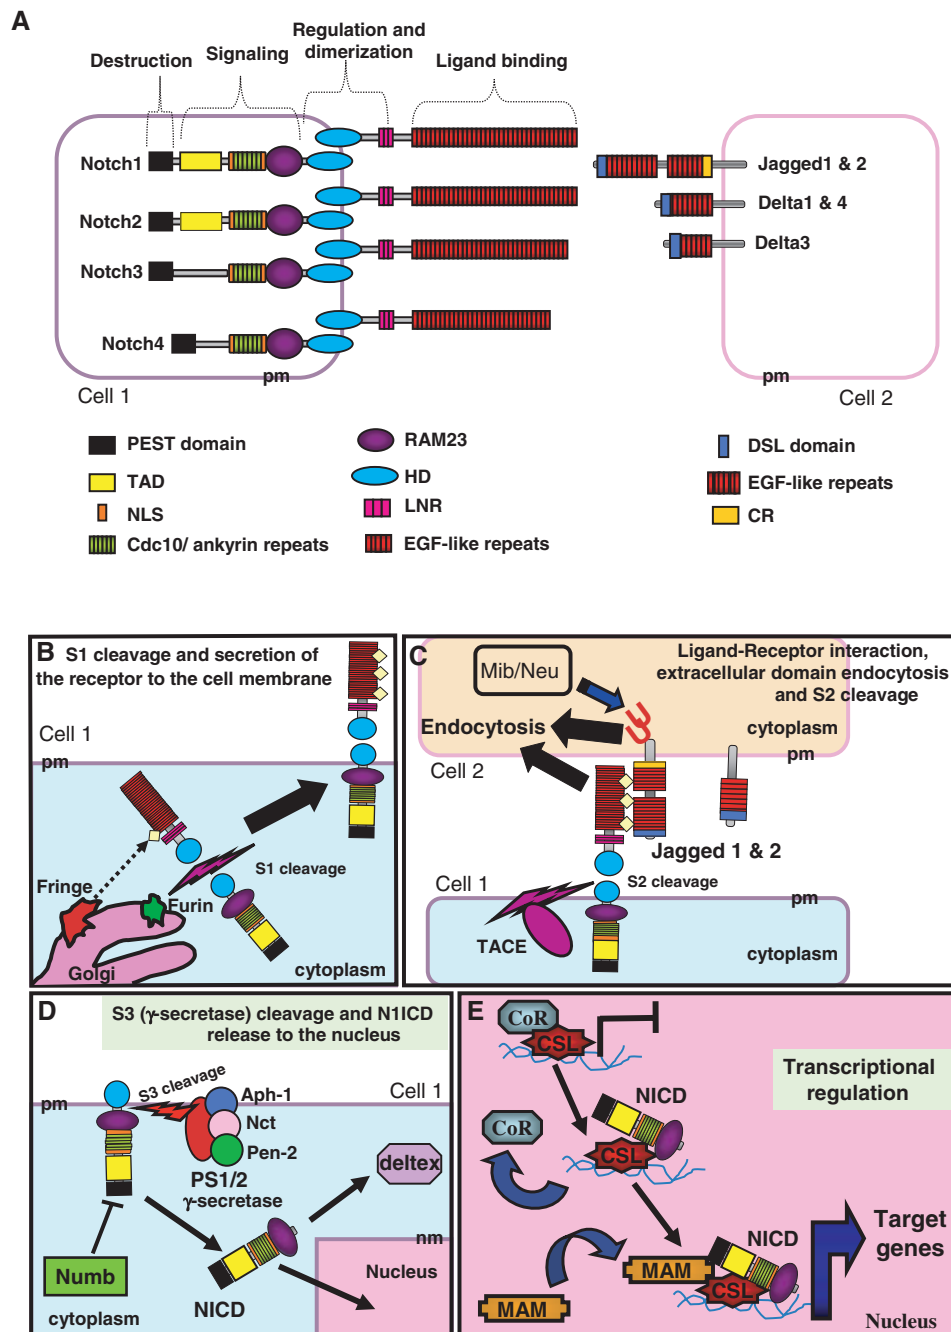

FIG. 1. Notch receptors and ligands and schematic representation of Notch signaling. A, Vertebrates have four Notch receptors (Notch1–4) expressed in the signal-receiving cell (Cell 1). The extracellular domain of Notch has between 29 and 36 EGF-like repeats (36 in Notch1 and Notch2, 34 in Notch3, 29 in Notch4) involved in ligand binding, followed by three cysteine-rich LNRs. The LNR domain prevents ligand-independent activation of the receptor and is followed by the heterodimerization domain (HD). The cytoplasmic part of the receptor contains the RAM23 domain, six cdc10/ankyrin repeats, two nuclear localization signals (NLS), a transcriptional transactivation domain (TAD), and a PEST sequence. Vertebrate receptors can be activated by at least five ligands (Jagged1 and 2 and Delta1, 3, and 4), expressed in the signaling cell (Cell 2). The ligands share an N-terminal DSL structure. Both Delta and Jagged ligands have EGF-like repeats in the extracellular domain, but only Jagged1 and Jagged2 harbor an additional cysteine-rich (CR) sequence downstream of the EGF-like repeats. B, The Notch receptor is secreted to the cell membrane in a furin convertase-dependent step (site 1 or S1 cleavage) that takes place in the Golgi. In this cell compartment, the glycosyltransferase fringe elongates previously attached fucose residues. Notch is expressed in the cell membrane as a heterodimer. C, Binding to Delta or Jagged ligands initiates two consecutive proteolytic cleavage events; the first is mediated by the ADAM protease TACE and occurs on the extracellular side of Notch, near the transmembrane domain (site 2 cleavage). D, The second cleavage (S3) occurs within the transmembrane domain and is mediated by  $\gamma$ -secretase activity, a complex composed of four different integral membrane proteins: presenilin, nicastrin (Nct), Aph-1, and Pen-2 (286). NICD is released and translocates to the nucleus. In the cytoplasm, the Numb protein negatively regulates Notch signaling, possibly by promoting receptor turnover. Deltex proteins may transduce Notch signals independently of CSL. E, In the nucleus NICD binds to the CSL transcription factor, converting it from a transcriptional repressor into a transcriptional activator by displacing a CoR complex and recruiting coactivators such as MAML1 (MAM). This leads to transcriptional activation of downstream target genes. pm, Plasma membrane; nm, nuclear membrane.

glycosyl transferase fringe (23, 24) (Fig. 1B). This prevents Notch activation by Jagged but not by Delta ligands (Refs. 25 and 26; reviewed in Ref. 27). Notch signaling initiates through ligand-receptor interactions between neighboring cells, leading to two consecutive proteolytic cleavages of the receptor, which ultimately liberate NICD (Fig. 1, C and D). Thus, after ligand binding, the ubiquitin ligases mind bomb (28, 29) or neuralized (30–32) interact with the ligand intracellular domain to promote its ubiquitination and internalization (28) (Fig. 1C). Ligand endocytosis leads to a conformational change in Notch that allows ADAM (metalloprotease and disintegrin) protease TACE (TNF- $\alpha$ -converting-enzyme), to cleave the receptor at a second site (S2) on the extracellular side, near the transmembrane domain (33) (Fig. 1C); the released extracellular portion of the receptor is then transendocytosed to the ligand-expressing cell (34) (Fig. 1C). The third cleavage (S3) occurs within the transmembrane domain and is mediated by a  $\gamma$ -secretase activity whose key components are presenilin and nicastrin (35) (Fig. 1D). This final cleavage liberates NICD, which subsequently translocates to the nucleus where it binds via its RAM23 domain to the transcription factor CSL (CBF1 in humans, Suppressor of Hairless in *Drosophila*, LAG in *Caenorhabditis elegans*), also called RBPJK in mice. In the absence of Notch activity, CSL proteins bind to promoters of its target genes and recruit histone deacetylases (36) and corepressors (CoR; Fig. 1E) that inhibit transcription. The corepressor molecules include SMRT/NcoR (37) and SHARP/MINT/SPEN (38). The NICD/CSL interaction converts CSL from a transcriptional repressor into a transcriptional activator by displacing the corepressor complex and recruiting coactivators (Fig. 1E) such as Mastermind-Like 1 (MAM; Fig. 1E) (39) and histone acetyltransferase (40). A number of additional proteins modulate Notch signaling, including the RING-domain E3 ubiquitin ligase deltex (41, 42) and the phosphotyrosine-binding domain (PTB)-containing proteins numb and numb-like (43), which act as context-dependent negative or positive Notch regulators (Fig. 1D).

To date, only a few target genes have been identified; some are Notch-dependent in various tissues, whereas others are tissue-specific. The best-known Notch target genes are members of the basic helix-loop-helix (bHLH) hairy/enhancer of split (*Hes*) family, the related HRT/*Herp* (Hes-related repressor protein) transcription factor family (44), the cell cycle regulator p21 (45), the Notch pathway element Notch-regulated ankyrin repeat protein (*Nrarp*) (46), *deltex1*, and the *pre-T cell receptor- $\alpha$*  gene (47). For an in-depth study of the molecular intricacies of Notch signaling elements see Refs. 48–51.

Here we will examine the role of Notch in specific developmental processes such as central nervous system (CNS) development, somitogenesis, cardiovascular development, and endocrine development, with attention to the distinct mechanisms by which Notch regulates cell specification and patterning in these tissues. We will then analyze the role of Notch in cancer, both in leukemia and in solid tumors, and describe studies that suggest possible means of therapeutic intervention. As a rule, when we refer to humans, the elements of the pathway are named in capital letters (*i.e.*, NOTCH1 receptor or NOTCH1 gene), and when we refer to

experimental models, the elements of the pathway are named in lowercase (Notch1 protein or *Notch1* gene).

## II. Notch in Vertebrate CNS Development

During vertebrate CNS development, the primitive neuroepithelium gives rise to two main lineages, neurons and glia. Neurons are generated in embryonic life from multipotent progenitors close to the ventricle and, after their final mitotic division, migrate away from their birthplace to their ultimate destinations, where they terminally differentiate and integrate into the brain circuitry. Glial cells, in contrast, are generated in the proliferating subventricular zone at late embryonic and early postnatal stages.

During the past 10 yr, the role of Notch in the differentiation, morphogenesis, and function of the CNS has become increasingly valued. The phenotypic analyses of Notch-targeted mutants in mice and functional manipulation in other vertebrates have greatly benefited from knowledge generated by research in *Drosophila* neurogenesis (52). Poulson (2) was the first to associate lack of Notch function with an embryonic lethal phenotype in *Drosophila*; it is caused by failure of the early neurogenic ectoderm to segregate neural and epidermal cell lineages. In homozygous Notch mutant embryos, all cells become neuroblasts, which leads to hypertrophy of the neural tissue at the expense of the epidermis, giving rise to the so-called neurogenic phenotype (2). In vertebrates, Notch is required when the epidermal and neural lineages have already segregated; its inactivation results in a “neurogenic phenotype” represented by premature differentiation of neuronal progenitors, leading to the interpretation that Notch maintains a progenitor state and inhibits differentiation.

### A. Notch promotes progenitor diversification and inhibits neuronal differentiation

*Notch1* was the first Notch pathway gene to be disrupted by homologous recombination (53, 54). Mutant embryos die at midgestation [embryonic day 11 (E11)] with defective somitogenesis and placentation, although little attention was given to a possible neural phenotype. Subsequently, a detailed analysis of neural development in *Notch1* targeted mutants was reported (55). This study examined the expression of pathway components such as *Hes1*, *Hes5*, and *Delta1* and of early differentiation markers such as *NeuroD* (or *Neurod2*), *Math4A* (or *Neurog2*), and *NSCL-1* (or *Nhlh1*). Consistent with the view that Notch activity is needed for progenitor maintenance, expression of these markers was increased in mutants. In addition, *Hes5* expression was reduced in *Notch1* mutants, although *Hes1* expression appeared to be unaffected. This result was unexpected in light of the *Hes1* mutant phenotype (56) and the extensive literature supporting the idea that *Hes1* is a primary Notch/CSL target (reviewed in Ref. 57). Similar results in *RBPJK* targeted mutants (55) suggested that whereas *Hes1* may well be a true Notch target, it is also likely to be activated by other signaling pathways. After the original *Notch1* deletion studies, targeted alleles of *Notch2* (58, 59), *Notch3* (60), and *Notch4* (61) were also generated, as well as conditional (floxed) alleles of



*Notch1* (62). Although *Notch3* and *Notch4* do not have detectable phenotypes when deleted, *Notch2* mutants, similarly to *Notch1* mutants, die around E11 (58). In contrast to *Notch1* mutants, however, *Notch2* mutants do not show alterations in *Hes5* expression in the CNS. *Notch2* mutants undergo widespread cell death in the CNS starting around E9 (58), but it is not clear whether this phenotype reflects a role for *Notch2* in the developing CNS or whether it occurs as a consequence of other embryonic perturbations.

To circumvent the early lethality of *Notch1* deletion, several studies have addressed the effect of deleting this receptor in specific brain structures. In one case, conditional Cre-loxP-mediated recombination was used to delete *Notch1* from the medial cerebellar primordium (63). Consistent with the traditional model of Notch function in the nervous system, the authors found that *Notch1* deletion resulted in up-regulation of the proneural genes *Mash1* and *Math1* and precocious neuronal differentiation. More recently, conditional deletion of *Notch1* in the neural progenitor pool using a nestin-Cre promoter also resulted in precocious neuronal differentiation (64). Deletion of *Notch1* in the telencephalon, using the *foxg1*-Cre line, led to reduced neuron numbers later in development, most likely resulting from precocious neuron differentiation and earlier progenitor pool depletion (65). In support of this finding, the telencephalic deletion of *Notch1* led to a reduction in progenitor frequency (assayed as neurospheres) *in vitro* (66). This result is consistent with the reduced neurosphere frequencies observed after standard deletion of *Notch1*, *RBPJk*, *PS1* and *PS2* (67), or *Hes1* and *Hes5* (68). In summary, the conditional deletions of *Notch1* support the view that Notch signaling inhibits neuron differentiation and maintains the neural progenitor pool.

In addition to the receptor mutations, many Notch ligand mutations have been examined in mice. A few studies have analyzed the effect of deleting *Delta1* on neural development (66, 69). One of these studies found that *Delta1* mutants had decreased *Hes5* expression, consistent with the predicted reduction in Notch activation (66). This finding was previously documented in a comparative study of the role of Notch in somitogenesis (70). In addition, the study by Yun *et al.* (66) found that *Delta1* targeted mutants showed a decrease in radial progenitor markers and an increase in neuronal markers. These findings support the view that Notch signaling inhibits neuron differentiation in the developing CNS. Based on comparisons of the *Delta1*, *Mash1*, and other mutants, however, the authors suggest that Notch signaling might also regulate the diversification of the progenitor pool into distinct progenitor subtypes. This function would precede the role of Notch in inhibiting the differentiation of mature cell types (neurons and oligodendrocytes) and could convert a homogeneous proliferative pool into a heterogeneous mixture of stem cells, neuroblasts, and glioblasts. Further evidence that Notch signaling may generate progenitor diversity was obtained by *in vitro* analysis of *Delta1* targeted mutants (69). This report suggested that Notch signaling first specifies glial progenitors and then functions in those cells to promote astrocyte *vs.* oligodendrocyte fate. Both this study and the work described above indicate that in mice, Notch influences multiple choice points in the neural progenitor lineage.

As discussed previously, the Notch signaling cascade is transduced primarily through the transcriptional regulator CSL (RBPJk in mice), when nuclear translocation of NICD converts CSL from a repressor to an activator. Consistent with the *Notch1* mutant phenotype, *RBPJk* targeted mutants show altered gene expression, suggestive of widespread precocious neuron differentiation (such as decreased *Hes5* and increased *Delta1* and *NeuroD*) (55). As in the case of the other Notch pathway genes, conditional deletion of *RBPJk* in the CNS is likely to be highly informative.

The most widely accepted Notch/CSL targets are the *Hes* (71) and the *HRT* gene families (72). Although there are seven *Hes* genes, not all are clear Notch targets, and studies in the mammalian CNS have focused on *Hes1* and *Hes5*. *Hes1* mutant embryos show severe defects in neural development, including lack of cranial neural tube closure and anencephaly (56). Because these animals die perinatally, it is possible to examine alterations in gene expression at late developmental stages. Consistent with the canonical model, precocious neurogenesis in *Hes1* mutants was suggested by early expression of *Mash1*, *NSCL1*, and neurofilament markers. Studies with double mutant combinations reveal that *Hes1* and *Hes5* have redundant functions in the CNS, regulating the differentiation of the neural progenitor pool. *Hes1*; *Hes5* double mutants thus have a more severe phenotype than single *Hes1* and *Hes5* mutant phenotypes combined (68). *Hes1* mutants also show increased *Hes5* expression, suggesting the existence of a compensatory mechanism between these Notch targets (56). Lastly, although *Hes5* mutants showed some precocious neuronal differentiation, these animals were largely normal, suggesting that *Hes1* is able to compensate for lack of *Hes5* almost completely.

Inactivation of recently identified Notch signaling elements also leads to altered neurogenesis. Targeted mutagenesis of *mind bomb1* causes a phenotype relatively similar to that of *Notch1* or *RBPJk* mutants, which result in embryonic lethality at E10.5. There is also a strong neurogenic phenotype in the CNS, with premature neurons undergoing apoptosis soon after differentiation. Aberrant neurogenesis is a direct consequence of lowered *Hes1* and *Hes5* expression resulting from the inability to generate N1ICD (73).

### B. Notch in gliogenesis

In contrast to its “permissive” role in neuronal differentiation, Notch appears to have an instructive role in gliogenesis, directly promoting the differentiation of many glial subtypes. The results of *in vivo* studies involving mouse (74, 75), zebrafish (76), chick (77, 78), and *Xenopus* (79) are consistent with an instructive role for Notch signals in gliogenesis, through their conventional bHLH targets. Activation of Notch signaling favors the generation of Müller glia cells at the expense of neurons, whereas reduced Notch signaling induces production of ganglion cells, causing a reduction in the number of Müller glia.

In vertebrates (55, 80) as in *Drosophila* (81) early neurogenesis, Notch signaling operates among cells belonging to an equivalence group—because they express the same set of molecules and are functionally equivalent—and controls their commitment to differentiate via a mechanism termed

lateral inhibition (82). How a given cell within an equivalence group adopts the neuronal fate or not depends on the Notch ligand expression level. If a progenitor cell expresses more Delta ligand than its neighbors, it will become a neuron and will transmit an inhibitory signal to the Notch-expressing progenitors in contact with it, preventing these progenitors from differentiating prematurely into neurons and from expressing Delta. As a consequence, the cell that produces more ligand forces its neighbors to produce less; ultimately, individual neighboring cells are driven into different developmental pathways (83). Molecular genetic studies show that in this situation, ligand production is regulated by a negative feedback loop (84). This interpretation of the gene expression patterns has been documented extensively by experiments in *Xenopus* (79, 80), chick (78, 85), zebrafish (86–88), and mouse (55). Another example of lateral inhibition is the formation of sensory hair cells in the vertebrate inner ear (89), where a single cell within an equivalence domain expresses high Delta levels.

More detailed analyses of Notch function in the CNS have revealed that Notch is likely to regulate progenitor pool diversification and neuronal maturation (90). Emerging data also suggest that Notch signaling has a role in neuronal function in the adult brain (91). It will be of great interest to determine which components of the Notch signaling cascade function in each of these processes. Figure 2 summarizes the roles of Notch in embryonic and adult CNS.

### III. Notch in Somitogenesis

The somites are blocks of paraxial mesoderm cells lying at either side of the neural tube. They give rise to the vertebrae of the axial skeleton and their associated muscles and tendons, which retain a segmental or metameric pattern. In all vertebrates, somites are generated sequentially from the pre-

somatic mesoderm (PSM), the unsegmented paraxial mesoderm at the caudal end of the embryo (92). At the rostral end of the PSM, clefts appear, and successive blocks of somite tissue split off; meanwhile, the embryo grows caudally, with a relatively constant amount of PSM tissue. Once formed, somitic cells differentiate progressively to give rise to five major cell types: the bone, cartilage and tendons of the trunk, skeletal muscles of the body, and the dermis of the back (93, 94). Each somite is also subdivided into anterior and posterior compartments (A-P polarity), a subdivision that is already established in the anterior PSM (95). In addition, the different morphological specification of somites is established early in the PSM and relies mostly on the activity of *Hox* genes (96). The connection between somitogenesis and the nested expression domains of *Hox* genes in the paraxial mesoderm has been established (97), although the coordination of these two patterning processes is poorly understood. Notch involvement in somitogenesis was first suggested by the defects in somite morphology observed in mice with targeted mutations in the *Notch1* (54) and *RBPJk* (98) genes. In *Notch1* mutants, the PSM generates irregular somites in which the positioning of segmental boundaries is abnormal (54). Similarly, *Delta1* targeted mutants show abnormal somitogenesis with loss of A-P polarity (99). This phenotype is more severe in *RBPJk* mutants, which have fewer somites and a largely unsegmented paraxial mesoderm (70, 98) (Fig. 3, A–D). Studies using dominant-negative or constitutively activated Notch showed that perturbing Notch signaling in *Xenopus* produces similar phenotypes; somitic cells differentiated normally into myocytes, but the segmental organization of these cells is lost (100). The similarity of these phenotypes suggested that Notch is critical in the patterning process leading to somite boundary formation (92) and the establishment of the A-P polarity of somites (99, 101).

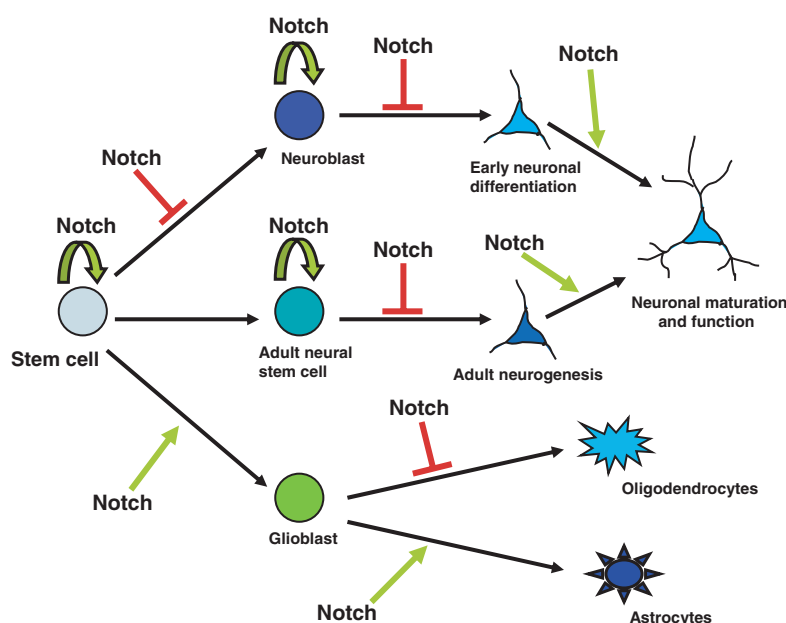

FIG. 2. Notch signaling in the developing and adult CNS. Processes that require Notch activity are labeled with *green arrows*, and those that require Notch inhibition are labeled with *red truncated arrows*. The *green semicircular arrows* indicate the requirement of Notch for progenitor pool maintenance. See text for details. [Adapted from K. Yoon and N. Gaiano: *Nature Neuroscience* 8:709–715, 2005 (287) with permission from Macmillan Publishers Ltd.]

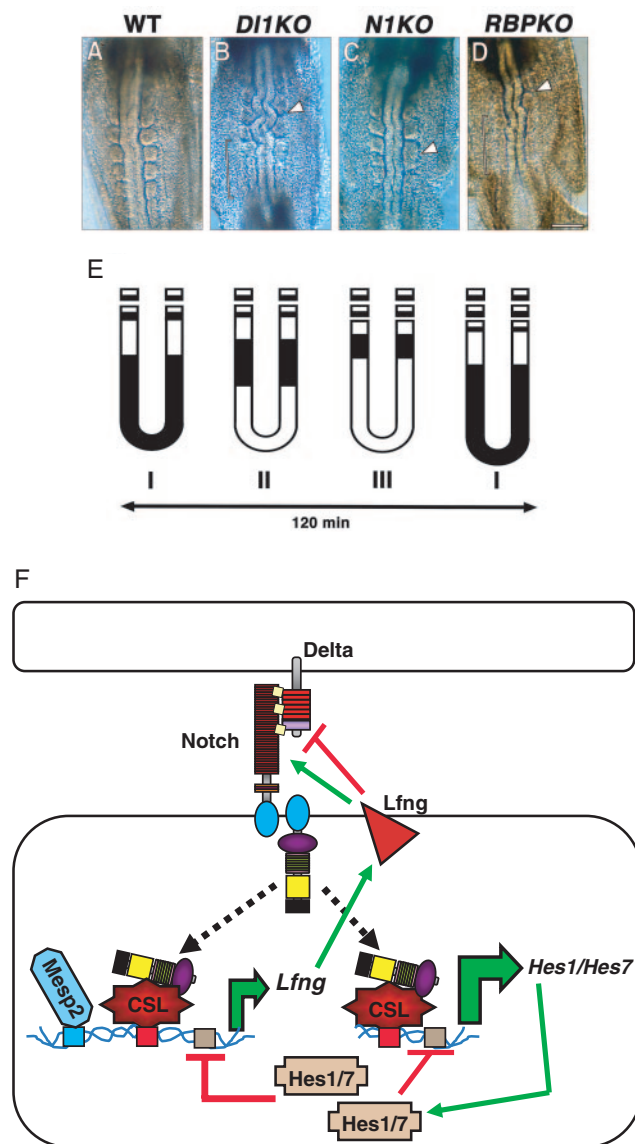

FIG. 3. Notch signaling is required for somite boundary formation. A–D, Dorsal view of the somitic region of E8.5 embryos. A, Wild-type embryo. B, *Delta1* targeted embryo. Note irregular somites (arrowhead) and unsegmented paraxial mesoderm. C, *Notch1* mutant embryo. Note irregular and fused somites (arrowhead). D, *RBPJk* mutant embryo. Note a few irregular somites (arrowhead) and a large stretch of unsegmented paraxial mesoderm. Scale bar, 50 μm. E, Oscillatory expression in the PSM (black). *chairy1* mRNA sweeps repeatedly across the PSM in a posterior-to-anterior direction, and each cycle is synchronous with the formation of a new somite. Blackened area represents the moving front of *chairy1* expression. F, Notch and the segmentation clock. In the posterior PSM, Delta-Notch signaling activates *Lfng*, *Hes1*, and *Hes7*. *Lfng* potentiates Delta-Notch interaction (green arrow), whereas *Hes1* and *Hes7* binding to E boxes (brown) repress *Lfng* and their own transcription, via a negative feedback loop. After *Hes1/Hes7* proteins disappear, their transcription is initiated *de novo* by activators such as Notch. Thus, *Lfng* expression oscillates in the same phase as *Hes1/7* expression. In the anterior PSM, *Mesp2* binds to N boxes (blue) in the *Lfng* promoter and activates its expression. *Lfng* in this situation inhibits Delta-Notch1 interaction (red truncated arrow). As a result, both waves of Notch1 activity and *Lfng* are arrested, and a boundary between Notch1 activity domain and the *Mesp2* expression domain is generated, which leads to a new segmental boundary. [Modified from Refs. 105, 108, 109, and 113.]

A great advance in the molecular analysis of segmentation was the discovery of *cHairy1*, a chick gene whose expression oscillates within the PSM, with a periodicity corresponding to a segmental cycle (102) (Fig. 3E). The *cHairy1* expression pattern provided the first molecular insight into a potential segmental clock. In addition, *cHairy1* belongs to a large family of bHLH transcriptional repressors, including proteins encoded by genes that are known to be direct Notch targets in other species, such as *Hes1* (103) in the mouse and the *Enhancer of Split* [*E(spl)*] genes in *Drosophila* (104). These observations, together with the defective somitogenesis of Notch targeted mutants described above, raised the possibility that the dynamic changes in *cHairy1* expression within the PSM could be driven by changes in Notch signaling, as part of a segmentation clock.

Oscillatory expression of other bHLH repressor genes in the PSM was later observed in other vertebrate embryos, although the gene with dynamic expression is not always the same. *Hes7* (105) and *Her1/7* (106, 107) are thus rhythmically expressed in the mouse and zebrafish embryo, respectively. In *Xenopus*, homologs of the oscillating zebrafish *Her1* gene are expressed in the PSM, but their expression does not oscillate (101). The emerging picture is that Notch signaling undergoes a dramatic spatial and temporal change within the PSM during each segmental cycle. Segmentation appears to rely on two major components; an oscillator, the segmentation clock, sets the periodicity of somite formation, and a dynamic wave-front defines the level at which PSM cells respond to the clock, providing a mechanism that spaces the segment boundaries (108).

How does the segmentation clock work? A negative feedback loop has been proposed as the major mechanism. A study by Hirata *et al.* (109) showed that the segmentation clock can be mimicked in cultured cells. After serum stimulation, expression of both *Hes1* mRNA and protein oscillates with a 2-h cycle. This coincides with the cycle of the segmentation clock in mouse (Fig. 3E), suggesting that the oscillators in cultured cells and the PSM share the same mechanism. *Hes1* protein oscillation is delayed by approximately 15 min relative to *Hes1* mRNA oscillation. Both *Hes1* mRNA and *Hes1* protein have very short half-lives, which enable 2-h cycle oscillatory gene expression. *Hes1* protein is degraded by the ubiquitin-proteasome pathway (109). When stabilized by proteasome inhibitors, *Hes1* protein constitutively represses its own transcription by binding directly to the *Hes1* promoter. Conversely, in the absence of functional *Hes1* protein, *Hes1* transcription is constitutively up-regulated. The negative feedback loop in which *Hes1* protein periodically represses its own transcription is thus the central mechanism for *Hes1* oscillation (Fig. 3F). It is likely that *Hes1* protein represses *Hes1* mRNA synthesis, but is rapidly degraded, allowing the next cycle of mRNA synthesis (109). Because *Hes1* transcription is constitutively up-regulated in the absence of functional *Hes1* protein, there appears to be a steady level of transcriptional activators in cultured cells after serum stimulation.

Because a simple negative feedback loop would be insufficient to maintain stable oscillation, another cycling factor might be involved. Such a cycling factor is not yet known for cultured cells, but for the segmentation clock, lunatic fringe



(*Lfng*) in mouse (Fig. 3F) and chick and *deltaC* in zebrafish might be implicated in maintaining stable oscillation in the PSM. Dale *et al.* (110) found that *Lfng* also establishes a negative feedback loop in chick, and that, in addition to *Lfng* mRNA, *Lfng* protein exhibits oscillatory expression in the PSM. Activation of Notch signaling induces *Lfng* transcription, but *Lfng* protein inhibits Notch signaling and thereby represses its own transcription. *Lfng* thus also periodically represses its own expression, like *Hes1* and *Hes7*. Analysis of the regulatory region of *Lfng* in mouse confirmed that it includes a site that mediates direct stimulation by activated Notch (111) but showed that it contains sites that mediate inhibition by bHLH proteins such as the *Hes* family members (112). This led to a model in which the inhibitory action of *Hes* genes plays a key role, and *Lfng* is assumed to potentiate Delta-Notch signaling (Fig. 3F), as in *Drosophila* (25). In contrast to this proposition, Morimoto *et al.* (113) have shown that Notch1 activity in mice oscillates in the posterior PSM. Somite boundaries would form at the interface between Notch1-activated and Notch1-repressed domains. This interface would be generated by suppression of Notch activity by the bHLH transcription factor *Mesp2* through induction of *Lfng* that, in contrast with its role in the wing margin (25), would inhibit Notch activation. It thus becomes clear that the function of *Lfng* could vary, depending on cell context and biological system. Another important finding is that Wnt signaling is also involved in the segmentation clock (114). *Lfng* oscillation is lost in vestigial tail mice (hypomorphic *Wnt3a* mutants), indicating that the Wnt pathway interacts with the Notch pathway, although the precise mechanism remains to be determined. Although great advances have been made in the past decade in understanding aspects of the somitogenesis process, many aspects, such as the molecular machinery that underlies the segmentation clock, remain to be explained. For a more detailed review on the molecular aspects of somitogenesis see Refs. 108, 115, and 116.

#### IV. Notch in Cardiovascular Development and Homeostasis

The cardiovascular organ system is the first to form during vertebrate embryogenesis, when the heart develops from the cardiogenic mesoderm to form the double-walled primary heart tube. This tube consists of two cell types: an inner layer of endocardial endothelial cells, and an outer myocardial layer which is separated from the inner layer by an extracellular matrix (the cardiac jelly). Endocardial endothelium and cardiomyocytes together constitute the primitive heart tube. The first rhythmic cardiac contractions are initiated at this double-walled stage of heart development (117). Interaction between endocardial endothelium and myocardium leads to formation of ventricular trabeculae, highly organized sheets of cardiomyocytes forming muscular ridges lined by endocardial cells (118). The formation of this spongy, trabeculated pattern substantially increases the endocardial endothelial surface area.

Tissue interactions between the myocardium and endocardium in the atrioventricular canal and outflow tract regions lead to epithelial-mesenchyme transition (EMT) of en-

docardial cells, to participate in cardiac valves and membranous septa formation (119). Cushion formation is followed by the development of more compact myocardium in the periphery of the developing cardiac ventricles.

Vascular development initiates with the differentiation of endothelial precursors, or angioblasts, into endothelial cells (120). These cells assemble to form a primitive vascular plexus of uniformly sized vessels composed entirely of endothelial cells by the process of vasculogenesis. This primitive vascular plexus is then remodeled to form the veins, arteries, and capillaries through the process of angiogenesis.

Different Notch ligands (20, 61) and receptors (6, 10, 121, 122), as well as their downstream effectors and target genes (72), are expressed in the vascular system. Functional studies in zebrafish (123) and mice (61) showed that Notch is a critical regulator of cardiovascular development. Evidence for a crucial function of Notch in vascular development and homeostasis is the finding that the human disease CADASIL (cerebral autosomal dominant arteriopathy with subcortical infarction and leukoencephalopathy), which involves the *NOTCH3* gene, causes stroke and vascular dementia (124). In addition, *JAGGED1* haploinsufficiency leads to the dominant inherited Alagille syndrome, which among other features is characterized by vascular anomalies (125, 126).

Analysis of mice with targeted mutations in *Notch1* or *RBPJk* revealed that these mutants have severe pericardial distension, indicative of a circulatory defect (53, 54, 98). Likewise, mutations of the *Delta1* (99) and *Jag1* (127) genes lead to vascular abnormalities and hemorrhage, indicative of an underlying vascular defect. Analysis of the *Notch1*; *Notch4* double mutants provided an insight into Notch function in the vasculature. Whereas *Notch4* mutants are viable and fertile, the *Notch1*; *Notch4* double mutants show normal vasculogenesis, but the process of angiogenesis is affected in the embryo proper, the yolk sac, and the placenta (61). This phenotype is more severe than that of *Notch1* mutants alone, suggesting that Notch1 and Notch4 have partially redundant roles during embryonic vascular development. From this study, it became clear that Delta4 was the key ligand for Notch1 and Notch4 receptors in the vasculature. In fact, *Delta4*-targeted mutants and endothelial-specific *RBPJk*-targeted mutants show a loss of arterial identity and arteriovenous malformations (128, 129), indicating that Notch signaling is required for arterial specification and patterning during development. These studies also suggested a relationship between Notch and EphrinB2/EphB4, another local cell signaling pathway involved in arterial-venous specification (130).

Targeted mutagenesis of potential Notch target genes in the cardiovascular system has helped to delineate the Notch signaling pathway that leads to arterial specification. *HRT1*; *HRT2* double mutants die after E9.5 and display severe angiogenic remodeling defects and massive hemorrhage, probably due to impaired arterial fate determination and maturation. This phenotype is very similar to that of zebrafish *gridlock* (*grl*) mutants, that show impaired aorta maturation (131). *Grl* encodes for the zebrafish homolog of mammalian *HRT2*. These report identified *HRT/CHF1/Hesr/Herp* genes as essential Notch effectors in vascular development. The view of Notch as a key regulator of arterial fate is consistent with

data indicating that ectopic activation of Notch signaling leads to repression of venous fate (132) and to severe vascular patterning defects (133). More recently, our understanding of how arterial-venous specification occurs has been refined by the study of an endothelial-specific mutant of the COUP-TFII transcription factor. Suppression of Notch signaling activity by COUP-TFII regulates vein identity, which may thus be genetically controlled and not derived by a default pathway (134, 135) (Fig. 4).

Specific Notch ligands and receptors are expressed in the heart from early developmental stages. *Delta4* (61), *Notch1* (6), and *Notch4* (10) are transcribed in the endocardial lineage from gastrulation onward, whereas other ligands and receptors show restricted expression in the myocardium from midgestation (136, 137). The Notch targets *HRT1* and *HRT2* are expressed in the endocardium and/or myocardium at different stages of cardiogenesis (72). Studies in *Xenopus* (138) and in mouse embryonic stem cells (139) indicate that cardiomyogenic commitment and differentiation require Notch signaling inhibition. *In vivo* studies in mouse and zebrafish nevertheless indicate that abrogation of Notch signaling does not affect primary cardiac cell fate determination and differentiation (139).

In *RBPJk*-targeted mutants, early cardiogenic differentiation and chamber identity is unaffected, but valve development is severely disrupted, presumably because of defective endocardial maturation and signaling (140). During valvulogenesis in the E9.5 mouse embryo, endocardial cells undergo EMT and form the cardiac cushions that later remodel to give rise to the thin, finely sculpted mature valve leaflets of the E14.5 embryo (141). *RBPJk* and *Notch1* mutants have a collapsed endocardium and lack mesenchymal cushion cells, indicating that endocardial EMT is defective in Notch

pathway mutants. Ultrastructural analysis of E9.5 mutant atrioventricular canal endocardia reveals that cells remain in close association, abnormally maintaining adherens junctions, and do not invade the cardiac jelly, despite showing features of activated premigratory endocardial cells. These observations correlate with a specific reduction in the transcription of the snail repressor (*snai1*) (142) in the atrioventricular canal region. Concomitantly, *VE-cadherin* expression remains abnormally stabilized in the atrioventricular canal and outflow tract endocardium of the mutants, suggesting that the lack of snail expression prevents down-regulation of *VE-cadherin* in this tissue, blocking endocardial EMT. These findings demonstrate that Notch activity is required for endocardial EMT (140).

Explant assays with *Notch1* and *RBPJk* mutants demonstrate an impaired endocardial EMT, a phenotype reproduced in wild-type explants cultured with the  $\gamma$ -secretase inhibitor N-[N-(3,5-difluorophenacetyl)-l-alanyl]-S-phenylglycine t-butyl ester (DAPT). This finding is supported by Notch inhibition experiments in zebrafish that impair valve development and by gain-of-function experiments in which transient overexpression of *NIICD* in the heart leads to formation of hypertrophic atrioventricular valves (140). This result contrasts with recent zebrafish data reporting that restricted *NIICD* overexpression in the endocardium of atrioventricular canal inhibits EMT (143). Conditional activation of *Notch1* in the cardiac lineage of the mouse using a *MesP1*-CRE driver impairs atrioventricular myocardial differentiation and ventricular myocardium maturation of *MesP1*-CRE; *NIICD* transgenic mice, but EMT occurs normally (144). This discrepancy may be explained by the fact that *NIICD* RNA was ectopically expressed in both endocardium and myocardium (140), which may generate additional myocardial-derived EMT-inductive signals. In the case of the experiments by Beis *et al.* (143), *NIICD* was overexpressed exclusively in the endocardium. Our own data infecting wild-type atrioventricular canal explants with a retrovirus expressing *NIICD* are consistent with this possibility, because *NIICD*-transduced explants transform more than controls (J. Grego-Bessa, L. Luna-Zurita, and J. L. de la Pompa, unpublished data). The relevance of Notch in human cardiac valve development and homeostasis was demonstrated by the recent finding that *NOTCH1* mutations cause aortic valve disease in humans (145). Studies in mice in the same report show that similarly to *Notch1*, its target genes *HRT1/Hey1* and *HRT2/Hey2* are expressed in the aortic valve leaflets at E17.5 where they repress *Runx2*, a regulator of osteoblast cell fate. These results suggest that *NOTCH1* mutations cause an early developmental defect in the aortic valve and a later derepression of calcium deposition that causes progressive aortic valve disease (145).

*Jag1* and *Notch2* are also linked to cardiac development. Mice doubly heterozygous for *Jag1* and *Notch2* mutations exhibit developmental abnormalities characteristic of Alagille syndrome, such as jaundice, growth retardation, defective bile duct differentiation, and abnormal kidney, eye, and heart development. The cardiac defects include right ventricular hypoplasia, pulmonic valve stenosis, atrial and ventricular septal defect, and dextropositioning of the aorta (59). The Notch targets *HRT1/Hey1* and *HRT2/Hey2* have also been linked to cardiac development. *HRT2*-targeted mutant mice have several cardiac anomalies. Almost all *HRT2*

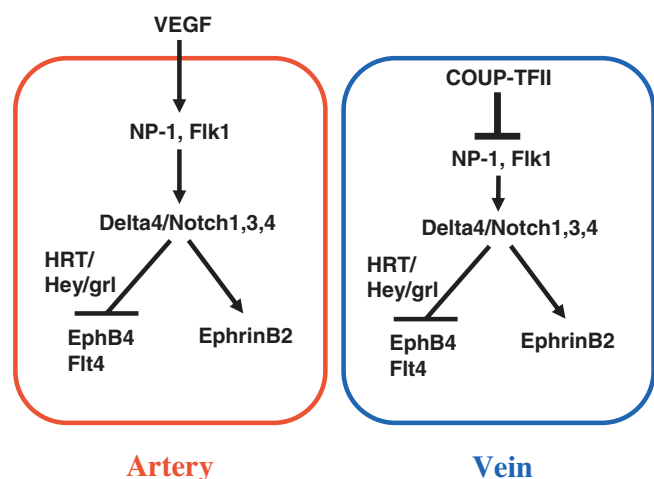

FIG. 4. Models of arterial-venous differentiation. In presumptive arterial endothelium, VEGF binds to its receptors neuropilin-1 (NP-1) and Flk1 that would in turn activate endothelial specific Notch signaling activity, leading to *HRT2*/gridlock-mediated repression of *EphB4* and *Flt4* receptor genes and activation of *EphrinB2* expression, triggering the arterial differentiation program. In presumptive vein endothelium, COUP-TFII suppresses NP-1 and Flk1 to down-regulate Notch activity and therefore release repression of *EphB4* and *Flt4* expression and down-regulate *EphrinB2* expression, leading to vein differentiation. [Adapted from L.R. You *et al.*: *Nature* 435:98–104, 2005 (134) with permission from Macmillan Publishers Ltd.]



mutants show growth retardation and die within 10 d of birth. Surviving *HRT2* mutants have enlarged atria and ventricles, and echocardiographic analysis revealed abnormal cardiac hemodynamics, including stenosis and regurgitation of the tricuspid valve, mitral valve regurgitation, membranous ventricular septal defect, and secundum atrial septal defect (146). The phenotypic variation reported in *HRT2* mutants probably results from the use of different genetic backgrounds and/or functional redundancy between *HRT2* and other *HRT* family members (147). Analysis of *HRT2* mutant mice suggests that *HRT2* is required for formation of the atrioventricular valves. In addition, mice lacking both *HRT1* and *HRT2* die during embryogenesis due to severe cardiovascular malformations, including those in the development of the atrioventricular cushions. Few cells undergo EMT in the *HRT1;HRT2* mice (148), suggesting that *HRT1* and *HRT2* function synergistically in the EMT process. In addition, *HRT1;HRT2* mice show defects in trabecular myocytes (148). Although the ventricular chamber containing both the compact and trabecular zones forms initially, subsequent apoptosis of trabecular zone myocytes leads to poor trabecular formation. It is thus clear that *HRT2* is important for correct cardiomyocyte development. The interaction between *HRT1*-expressing endocardial and epicardial cells and *HRT2*-expressing cells in the compact layer of the ventricle is also considered necessary to produce and/or maintain trabecular myocytes (149). Our own data (295) support a role for Notch in the development of ventricular myocardium, as the trabeculation-defective phenotype of standard and endocardial-specific *Notch 1* and *RBPJk* mutants indicates. We propose that Notch mediates an endocardium-myocardium interaction critical for trabeculation and ventricular chamber morphogenesis and identify two distinct Notch-dependent processes: 1) transition of primitive myocardial epithelium to trabecular and compact myocardium (*EphrinB2*- and *NRG1*-dependent); and 2) maintenance of a proliferating trabecular cardiomyocyte population (*BMP10*-dependent) during this transition. The defective ventricular phenotype of Notch mutants is reminiscent of a congenital disorder termed isolated ventricular noncompaction (IVNC) (296), which is characterized by altered myocardial structure. Thus, Notch signaling may be altered in infants with conditions including mal-septation, abnormal valve development or conduction system defects, all of which are related to abnormal trabeculation.

Notch activity in the cardiovascular system functions via a mechanism termed lateral induction (83), by which Notch generates contiguous domains of cells that share the same fate, an embryonic field. This signaling mechanism also occurs in flies during wing margin boundary formation (25). Other examples of Notch-mediated lateral induction in vertebrates include induction of proneural domains in the ear (150), formation of the limb bud margin (151), and somite boundary formation (83). In these cases, Notch activation promotes ligand production via a positive feedback loop, so that signaling occurs simultaneously in a developmental field. Loss of Notch signaling leads to down-regulation of ligand expression throughout the embryonic field, indicating the existence of a positive feedback loop.

Figure 5 summarizes the processes in which Notch is in-

volved during cardiogenesis. In a search for novel therapeutic approaches for cardiac disease, and in view of the role of Notch in the maintenance of an uncommitted state (152) and in inhibition of the cardiogenic fate *in vitro* (139), it will be of great interest to explore the role of Notch in adult cardiac homeostasis.

## V. Notch in Endocrine Development: Pancreas, Gut, and Bone Endocrine Cells

### A. Pancreatic development

The pancreas is an endoderm-derived organ formed by three main cell types, the exocrine acinar cells that produce digestive enzymes (*i.e.*, carboxypeptidase), the  $\alpha$ - and  $\beta$ -endocrine cells (islets of Langerhans) that produce the hormones regulating nutrient homeostasis (insulin and glucagon), and the elaborate branched ductal tree that connects with the intestine (153, 154). Pancreas formation begins early in development (around E9.0 in the mouse) with the formation of two cell buds, ventral and dorsal. These buds express the *Pdx1* transcription factor (155, 156) and arise from a specialized endodermal epithelium located in the foregut region that will give rise to the duodenum (157). During pancreatic organogenesis, the two buds undergo a series of morphogenetic, proliferative, and lineage specification events, grouped in three “developmental transitions,” to give rise to the mature and functional pancreas (for a review, see Refs. 158 and 159). At E13.5, the developing pancreas is formed by a branched *Pdx1*-positive epithelial tree, without morphological signs of exocrine differentiation. Endocrine and exocrine precursors are marked by two members of the bHLH transcription factors family, *Ngn3* and *Ptf1-P48*, respectively (160).

Specific Notch pathway elements and downstream effectors are expressed in the developing pancreas, suggesting a role for Notch in pancreatic development (161–163). Loss-of-function of various Notch pathway genes (*RBPJk*, *Delta1*, and *Hes1*) leads to up-regulation of the proendocrine gene *Ngn3* (164), a direct *Hes1* target (165), and consequent accelerated and increased differentiation of pancreatic endocrine cells (161, 162). Conversely, forced Notch activity in the embryo blocks both endocrine and exocrine pancreas development (166, 167), and in pathological situations it leads to dedifferentiation of exocrine cell types in pancreatic epithelium (168). The physiological relevance of Notch in exocrine pancreas has been shown in the mouse, where Notch is active in committed exocrine progenitors cells and whose ectopic activation in pancreatic bud explants represses acinar cell differentiation (169). The available data indicate that Notch regulates the progressive recruitment of endocrine and exocrine cell types from a common precursor pool in developing pancreas. The inhibitory effect of Notch signaling in exocrine differentiation has been well characterized in zebrafish, where endocrine and exocrine cells arise independently (170). Thus, accelerated exocrine differentiation is observed in zebrafish *mind bomb* mutants or upon expression of a dominant negative *Su (H)* version in wild-type embryos (169).

Similarly to the CNS, Notch operates in the developing pancreas by lateral inhibition. This would explain the ini-

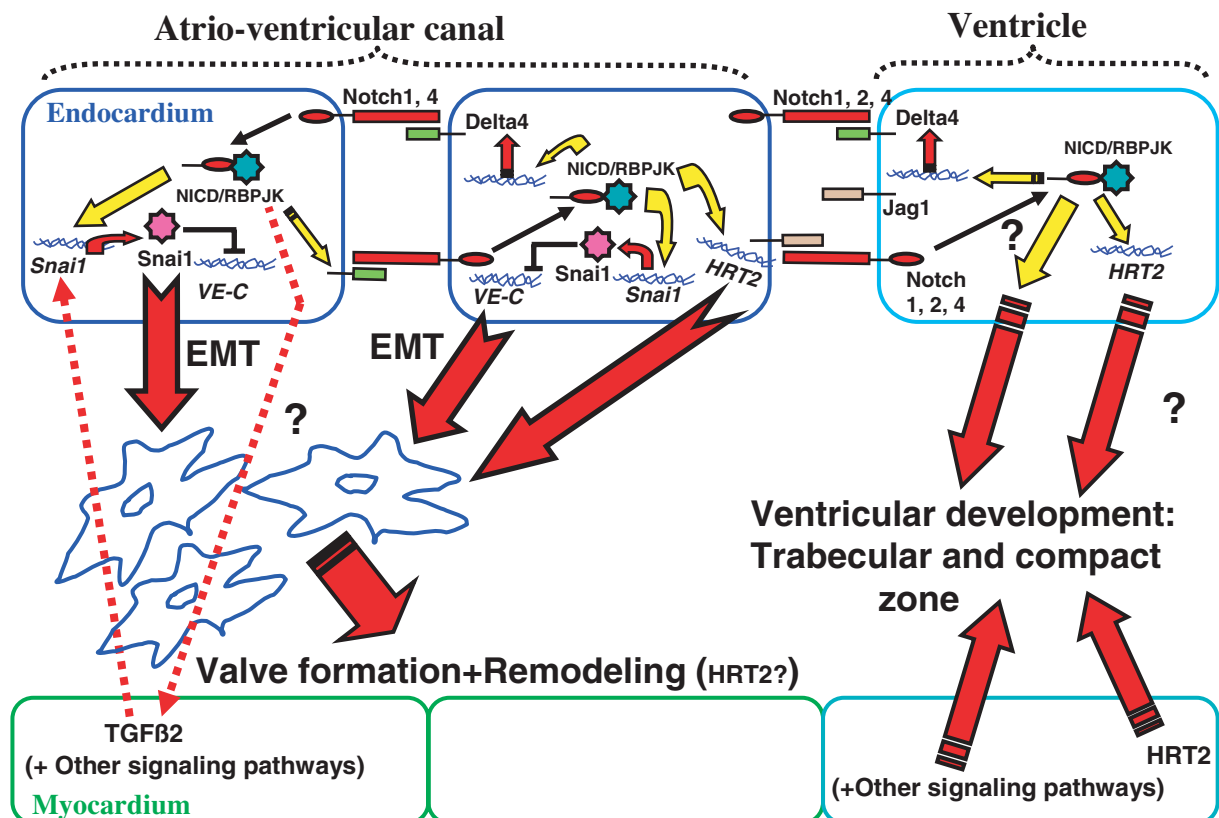

FIG. 5. Notch activity and cardiac development. The endocardial endothelium expresses specific Notch ligands and receptors simultaneously, behaving as an embryonic field. In the atrioventricular canal and outflow tract regions (data not shown), Delta4/Notch1 receptor interactions lead to *snai1* expression, which represses *vascular endothelial cadherin* (VE-C) expression, allowing endocardial cells to down-regulate adhesion, undergo EMT, and acquire a mesenchymal phenotype. Notch activity in the endocardium is also required for the production of a soluble signal that activates *TGFβ2* expression in the myocardium. *TGFβ2* binding to its endocardial receptors would also lead to *snail* expression and EMT induction. In the ventricular endocardium, Notch signaling mediated by HRT2 (among other factors) is required for ventricular chamber development and trabeculation. Other signaling pathways active in the myocardium may cooperate with Notch in this process. In addition, myocardial HRT2 would also be involved.

tially dispersed distribution of endocrine cells within the pancreatic epithelium. Consistent with this idea, *Hes1* mutants show increased expression of the Delta 1 and Delta 3 ligands (162). Nevertheless, additional observations suggest that Notch signaling in the pancreas does not function only via lateral inhibition and perhaps respond to additional signals, emanating from the mesenchyme. Fibroblast growth factor 10 (FGF10) produced in pancreatic mesenchyme has been shown to be essential for precursor pool maintenance (171). Transgenic mice overexpressing FGF10 in pancreatic epithelia show pancreatic hyperplasia and a block in exocrine, ductal, and endocrine differentiation (172, 173). In these mice and in contrast to the wild-type situation (161, 162), *Notch1* and *Notch2* as well as *Hes1* are ubiquitously expressed in pancreatic precursor cells, whereas *ngn3* expression is abrogated (172, 173). Thus, ectopic FGF10 signaling is capable of maintaining Notch signaling activity in the pancreas. These observations have led to the suggestion that another mechanism different from lateral inhibition and termed “suppressive maintenance” sustains Notch signaling activity in the pancreas and suppress its differentiation (159, 172). The mechanism underlying suppressive maintenance is not well understood, but it may involve FGF10-dependent activation of the Jag 1 and Jag2 Notch ligands in pancreatic

epithelium (172). It remains to be seen what is the effect of Notch signaling abrogation on the expression of its ligands.

A further refinement of our view of Notch in pancreatic development has come from the analysis of *Hes1*-targeted mutant mice. *Ptf1* is misexpressed in discrete regions of the primitive stomach and duodenum and throughout the bile duct of *Hes1* mutants. *Ptf1*-expressing cells are reprogrammed to multipotent pancreatic progenitors that differentiate into mature pancreatic exocrine, endocrine, and duct cells. These data demonstrate that Notch is required for proper regional specification of pancreas in developing foregut endoderm through *Ptf1* regulation (174). Because Notch is involved in the development and homeostasis of a variety of self-renewing tissues (175, 176), understanding Notch function in pancreatic development will help to design protocols to control  $\beta$ -cell development *in vitro* and thus treat diseases such as diabetes, in which the mass of insulin-producing  $\beta$ -cells is reduced.

#### B. Gut development

The gastrointestinal tract comprises the small intestine and colon. Small intestine epithelium is organized into finger-like villi and adjacent invaginations, the crypts of Lieberkühn; the

colon has a flat epithelial surface with no villi (177). In small intestine, the crypt compartment contains stem cells and progenitors, whereas the villus compartment is made up entirely of differentiated cells. Pluripotent stem cells, which reside at the crypt bottom, give rise to transit amplifying cells, which divide robustly before terminal differentiation. Four lineages can be distinguished in the gastrointestinal tract, *i.e.*, absorptive enterocytes, mucus-secreting goblet cells, hormone-secreting enteroendocrine cells, and lysozyme- and cryptidin-producing Paneth cells (reviewed in 175). Enteroendocrine cells can be further subdivided on the basis of the hormones they secrete (178). Intestine homeostasis depends on a small number of evolutionarily conserved pathways, including bone morphogenetic protein (BMP)/TGF $\beta$ , sonic hedgehog (Shh), wingless (Wnt) and Notch (179).

The analysis of mutant zebrafish or targeted mice deficient for different Notch pathway elements or target genes has implicated Notch in the regulation of the earliest intestinal cell fate decisions. Thus, a recent study describes increases in secretory cells at the cost of absorptive cells in the intestines of zebrafish that are mutant for *DeltaD* and *mind bomb* (180). Different Notch pathway elements are expressed in murine crypts (181). The Notch target *Hes1* is expressed in crypts (162). Analysis of the developing fetal intestine of *Hes1* mutant mice revealed an increase in mucosecreting and enteroendocrine cells at the expense of absorptive enterocytes (162). The crypt progenitor pool in the small intestine seemed unaffected, as judged by an analysis of proliferative activity. *Math1* is a target gene of *Hes1*-mediated repression in several organs, including the intestine (182). *Math1* mutant mice die neonatally. Although the crypt-villus architecture was essentially undisturbed in the mutant mice, commitment toward the secretory lineage had entirely halted (182). These results have been interpreted to indicate that *Hes1* and *Math1* are required to skew the fate of differentiating cells leaving the transit amplifying compartment toward an enterocyte or a secretory phenotype, respectively (162, 182).

Conditional deletion of the *RBPJK* effector in the epithelium of the small intestine and colon using different CRE-driver lines led to a decrease in *Hes1* expression, and *Math1* was up-regulated throughout the crypt compartment, whereas it is normally expressed only in secretory cells (183). In addition, the number of goblet cells was increased. In the small intestine, Paneth cells appeared in near-normal numbers at the bottom of the crypts. However, the rapidly dividing transit amplifying compartment, which normally occupies the remainder of the crypt, was entirely replaced by postmitotic goblet cells that expressed *Math1* protein but not *Hes1*. Examination of proliferation by different techniques indicated that basically all epithelial cell division had halted. Essentially identical observations were made in the colon (183). As an explanation for the different severity of the phenotypes observed upon *Hes1* deletion and conditional *RBPJK* deletion in colon, it has been argued that other *Hes* genes such as *Hes6* are affected by conditional *RBPJK* deletion (183). This phenotype was confirmed using a highly efficient  $\gamma$ -secretase inhibitor. Cell proliferation had entirely halted and histological markers revealed that the tissue changes were indistinguishable from those observed after *RBPJK* deletion (183).

A reciprocal phenotype to that of *RBPJK* deletion in colon was obtained in transgenic mice overexpressing N1ICD in all cells of the intestinal epithelium, by virtue of the villin-CRE driver (184). N1ICD; villin-CRE transgenic mice have a complete lack of goblet cells in all intestinal tracts. In addition, enteroendocrine cells are markedly reduced, as well as Paneth cells (184). Microscopic examination of earlier developmental stages revealed that already at E18.5, N1ICD expression affects the architecture of the villi, and thus the differentiation of secretory cell lineages along the duodenal-ileal axis and the cranial-to-caudal wave of intestinal differentiation was inhibited (184). Transcriptional analysis revealed a direct correlation between N1ICD expression and elevated levels of *Hes1* transcription in the intestinal epithelium of N1ICD transgenic mice, although no other *Hes* genes were affected. Expression of the *Hes1* targets *Math1* (185) and *ngn3* (165), involved in secretory cell lineage specification, was reduced in N1ICD; villin-CRE mice. This finding was consistent with the idea that the expression of *Math1* and *ngn3* is repressed by Notch activation (184). This intestinal phenotype is reminiscent of *Math1* (lack of goblet and enteroendocrine cells) and opposite to that of *Hes1* mutant mice (an excess of secretory cells at the expense of enterocytes). Thus, the gain-of-function phenotype of N1ICD; villin-CRE mice provides direct evidence that Notch signals target *Hes1* in the intestine, explaining mechanistically the differentiation defects observed. Overall, these genetic data indicate that Notch-mediated *Hes1* expression regulates a binary cell fate decision between absorptive and secretory cell fates. However, *Hes1*-deficient mice do not show a change in the proliferative status of the intestinal precursor pool (162), whereas Notch activation profoundly affects the proliferation potential of intestinal progenitors (184), suggesting that other Notch targets may be responsible for the increased proliferation. The effect of deregulated Notch signaling in colon homeostasis and cancer will be discussed in Section VI.B.

### C. Bone development

Bone is a dynamic tissue that is constantly renewed and degraded. Two main types of bone cells are responsible for these processes: bone-forming osteoblasts of mesenchymal origin, and bone-resorbing osteoclasts of hematopoietic origin. Bone formation and resorption are coordinated so that bone remodeling is balanced. When this equilibrium is altered in a way that bone resorption exceeds bone formation, osteoporosis occurs. This disease is prevalent in old age and is characterized by bone loss and a high risk of fractures. Therefore, knowledge about molecular events involved in osteoblast differentiation is crucial.

The *in vitro* potential of Notch pathway in osteoclastogenesis and osteoblastogenesis has been investigated in several reports. Evidence indicates that Notch down-regulates osteoclastogenesis activation, reduces the surface expression of c-Fms, which is a receptor for macrophage colony-stimulating factor, in osteoclast precursor cells and enhances the expression of osteoprotegerin in stromal cells, which results in the down-regulation of osteoclastogenesis (186). However, controversial results have been obtained with respect to os-



teoblastic differentiation. Continuous NICD expression inhibits bone morphogenetic protein 2-induced osteoblast differentiation in osteoblast precursor cells (187). In contrast, transient expression of NICD in osteoblast precursor cells leads to an enhanced bone mineral deposition (188). Notch1 is expressed in the mesenchymal condensation area and subsequently in the hypertrophic chondrocytes during chondrogenesis (189). Another study shows that Notch1, Delta1, and Jagged1 are expressed in cultured osteoblast precursor cells as well as in differentiating osteoblasts during bone regeneration, and that Notch1 is activated in these cells (190). These results suggest that Notch signaling plays an important role in the commitment of mesenchymal cells to the osteoblastic cell lineage (190). Concomitant expression of Delta1 and Jagged1 during *in vivo* bone regeneration suggests that there is a functional redundancy between Delta1 and Jagged1 and that these ligands direct osteoprogenitor cells to the differentiated status through identical signaling pathways (190). These data suggest a therapeutic potential for Notch in bone regeneration as well as osteoporosis.

Mammalian bone marrow architecture involves hematopoietic stem cells (HSCs) in close proximity to the endosteal surfaces of bone (191), with more differentiated cells arranged in a graduated fashion as the central longitudinal axis of the bone is approached (192), suggesting a relationship between HSCs and osteoblasts. Osteoblasts produce hematopoietic growth factors (193) and are activated by PTH or the locally produced PTHrP through the PTH/PTHrP receptor (PPR). Experiments involving transgenic mice expressing in osteoblastic cells a constitutively active PPR under the control of the  $\alpha 1(I)$  collagen promoter showed increased numbers of trabeculae and trabecular osteoblastic cells in the long bones of transgenic mice (194). In addition, the number of HSCs was also increased in these mice, but mature cell number was not changed (194). Because this phenotype was reminiscent of the mode of Notch action in hematopoiesis (195) and Jag1 is expressed by marrow stromal cells (196) and by murine osteoblasts (197), the levels of Jag1 protein were analyzed in the bone marrow of transgenic mice. *col1-caPPR* transgenic mice showed a marked increase in Jag1 expression in osteoblastic cells. The response of hematopoietic stem cells to increased Jag1 expression was measured by NICD staining, which was increased in transgenic mice. These data support a model in which PPR activation in the osteoblastic population increases cell number and the overall production of Jag1. This, in turn, may activate Notch on primitive hematopoietic cells, resulting in expansion of the stem cell compartment (194). In another study, these authors demonstrated that PTH treatment led to increased levels of Jagged1 in osteoblastic cells both *in vivo* and *in vitro*, in a protein kinase A (PKA)-dependent manner (198). Because Jagged1 is very important in stromal-HSC interactions and PTH regulates HSC expansion through osteoblastic activation, these studies suggested that stimulation of osteoblastic PKA activation may alter the HSC niche. This is of great therapeutic importance because this study suggests that alternative means to stimulate osteoblastic PKA activation may alter the HSC niche. In addition, Jagged1/Notch signaling modulates osteoblastic differentiation (189), and Jagged1 may play a critical role in mediating the effects of PTH on osteoblasts.

## VI. Notch in Cancer

Experimental evidence supports the idea that signaling pathways essential for embryonic development also have a role in regulating self-renewing tissues (199, 200). Mutations in these pathways (such as TGFB, Wnt, and ErbB) often lead to tumorigenesis, as is also true for Notch (reviewed in Ref. 200). An interesting aspect of Notch is its apparently opposite functions in tumor development, because it can act as an oncogene or as a tumor suppressor. Although the mechanism underlying this dual Notch action is being explored, the outcome of Notch signaling activity depends on signal strength, timing, cell type, and context (reviewed in Ref. 201). The result of altered Notch signaling depends on its normal function in a given tissue. Notch thus acts as an oncogene if its normal function is as a gatekeeper of stem cells or as a regulator of precursor cell fate; its tumor suppressor activity is detected in tissues in which Notch signaling initiates terminal differentiation events (202). Table 1 summarizes the involvement of abnormal Notch signaling in cancer.

The oncogenic function of Notch is shown by the finding that truncated forms of all four Notch isoforms (Notch1–Notch 4), resulting in constitutively active Notch signaling, have transforming activity *in vitro* (203) and in various animal models (204–208). Furthermore, deregulated expression of wild-type Notch receptors, ligands, and targets is found in many human solid tumors (209, 210) and hematological malignancies (176, 210). Notch inhibition by antisense retrovirus or by pharmacological  $\gamma$ -secretase blockade has antineoplastic effects in Notch-expressing transformed cells *in vitro* and in xenograft models *in vivo* (Refs. 211–214; reviewed in Refs. 176 and 209). Notch alone may not be a very efficient oncogene, however, and it must associate with another oncoprotein to cause transformation. Although such partners have not yet been identified in naturally occurring tumors, transformation can be induced *in vitro* in various cell types by expressing NICD with certain oncoproteins (215, 216). The Notch tumor suppressor function may be a peculiarity of the mouse skin system, or it may also apply in man and include human keratinocytes as well as other human epithelial cell types (217). Available evidence thus suggests that, with the possible exception of some human epidermal malignancies, Notch signaling inhibition is a viable strategy for treatment of certain solid and hematopoietic tumors (176, 209). JAG1 expression in head and neck squamous cell carcinoma (HNSCC) cells triggers Notch activation in neighboring endothelial cells and promotes network formation (218). In xenograft models, HNSCC cells overexpressing JAG1 formed larger tumors with increased vascularization, and JAG1 protein levels were notably higher in HNSCC samples than in normal samples (218). These results offer a causal link between Notch signaling and tumor angiogenesis and describe a novel juxtacrine signaling mechanism from tumors to surrounding vasculature. As we saw in *Section IV*, Notch is essential for angiogenic remodeling in the embryo and for vascular homeostasis in the adult. This study shows that Notch is also involved in pathological angiogenesis (218), suggesting a possible direction for therapeutic intervention in tumors. In this regard, a recent report has shown that VEGF-induced Delta4 acts as a negative regulator of tumor

TABLE 1. Abnormal Notch signaling in tumorigenesis and EMT

| Tumor type/process           | Function                          | Human models                                                                                     | Animal models                                                                                                                                                                                                                                                                                                                                 |
|------------------------------|-----------------------------------|--------------------------------------------------------------------------------------------------|-----------------------------------------------------------------------------------------------------------------------------------------------------------------------------------------------------------------------------------------------------------------------------------------------------------------------------------------------|
| Hematological tumors         |                                   |                                                                                                  |                                                                                                                                                                                                                                                                                                                                               |
| T cell malignancies (T-ALL)  | Oncogenic Notch signaling         | Constitutively active NOTCH1: t(7; 9) (q34;q34.3) (223), activating mutations (224, 289)         | Activating mutations in Notch1 in mouse models of T-ALL (290). Constitutively active Notch2 (291). Constitutively active Notch3. Transgenic mice; lck promoter-driven intracellular Notch3 (205). DLL4 overexpressing mice (292).                                                                                                             |
| B cell malignancies          | Oncogenic Notch signaling         | Notch1, Notch2, and Jagged1 (229–231)                                                            | Intracellular Notch1–4, Jagged 1–2 (232)                                                                                                                                                                                                                                                                                                      |
|                              | Tumor suppressive Notch signaling | Intracellular Notch1–4, Jagged 1–2 (232)                                                         |                                                                                                                                                                                                                                                                                                                                               |
| Solid tumors                 |                                   |                                                                                                  |                                                                                                                                                                                                                                                                                                                                               |
| Breast cancer                | Oncogenic Notch signaling         | Notch1 and Jagged-1 (252, 253)                                                                   | Constitutively active Notch4 in transgenic mice: MMTv insertion (239), MMTv-intracellular Notch4 (237); WAP- intracellular Notch4 (240). Constitutively activated Notch1 in transgenic mice: MMTv insertion (242), MMTv-intracellular Notch1 (207, 208). Constitutively activated Notch3 in transgenic mice: MMTv-intracellular Notch3 (208). |
|                              | Tumor suppressive Notch signaling | Notch2 (252)                                                                                     |                                                                                                                                                                                                                                                                                                                                               |
| Gut cancer                   | Oncogenic Notch signaling         |                                                                                                  | Notch signaling in APC min mice (183)                                                                                                                                                                                                                                                                                                         |
| Skin cancer                  | Keratinocyte-derived carcinoma    | Notch signaling in basal cell carcinoma (260)                                                    | Conditional ablation of Notch1 in murine epidermis (257). Conditional transgenic mice with epidermal inhibition of Notch signaling (SM22-Cre+/DNMAML1+ mice) (259).                                                                                                                                                                           |
|                              |                                   |                                                                                                  |                                                                                                                                                                                                                                                                                                                                               |
| Melanocyte-derived carcinoma | Oncogenic Notch signaling         | Notch1 in primary melanoma (265, 266) NOTCH2 and HEY1 (269)                                      |                                                                                                                                                                                                                                                                                                                                               |
| Cervical cancer              | Oncogenic Notch signaling         | Notch1 in early disease stage (293)                                                              | PAE cell line (140).                                                                                                                                                                                                                                                                                                                          |
|                              | Tumor suppressive Notch signaling | Notch1 in late disease stage (293, 294)                                                          |                                                                                                                                                                                                                                                                                                                                               |
| EMT                          | EMT promoter                      | JAGGED1 in prostate cancer metastasis (284). MCF 10A cell line (212). Human keratinocytes (283). |                                                                                                                                                                                                                                                                                                                                               |

angiogenesis (219). Thus, tumor-derived VEGF induces Delta4 expression in angiogenic endothelial cells to negatively regulate vascular growth, acting to restrain excessive vascular sprouting and branching and allowing angiogenesis to proceed at a productive rate. Thus, increasing Delta4/Notch activity resulted in decreased vascular density associated with reduced sprouting and branching of the vascular network. On the contrary, the blockade of Delta4/Notch signaling produced enhanced angiogenic sprouting and branching, resulting in a marked increase in tumor vessel density but decreased tumor vessel function (219). These data suggest that an alternative treatment of tumors may be based on the promotion of “non-functional” tumor angiogenesis.

A. Notch in hematological tumors

Notch signaling mediates hematopoietic cell fate determination in the embryo (220) and in the adult (221) and is also a critical factor in the maintenance of a pool of self-renewing HSCs (222). Deregulated expression of Notch pathway ele-

ments can thus lead to development of hematological malignancies. The prototypical Notch-associated cancer is human acute T cell acute lymphoblastic leukemia/lymphoma (T-ALL), which constitutes approximately 15–20% of ALL in children and adults. The *NOTCH1* gene was discovered due to its involvement in a chromosome translocation [t (7; 9)] seen in some human T-ALL; this leads to expression of N1ICD in a T cell receptor-β-regulated manner (Fig. 6A) (223). *Notch1* was later shown to be essential for normal T cell progenitor development (62). Although t (7; 9) is rare (less than 1% of T-ALL; Fig. 6A), the majority of human T-ALL have gain-of-function mutations in *NOTCH1*, leading to aberrant increases in downstream signaling (Fig. 6A) (224), placing the NOTCH pathway at the center of T-ALL pathogenesis. Weng *et al.* (224) found that more than 50% of human T-ALL without specific (7; 9) chromosome translocation, including tumors from all major molecular oncogenic subtypes, have activating mutations that involve the *NOTCH1* extracellular heterodimerization domain and/or the C-ter-

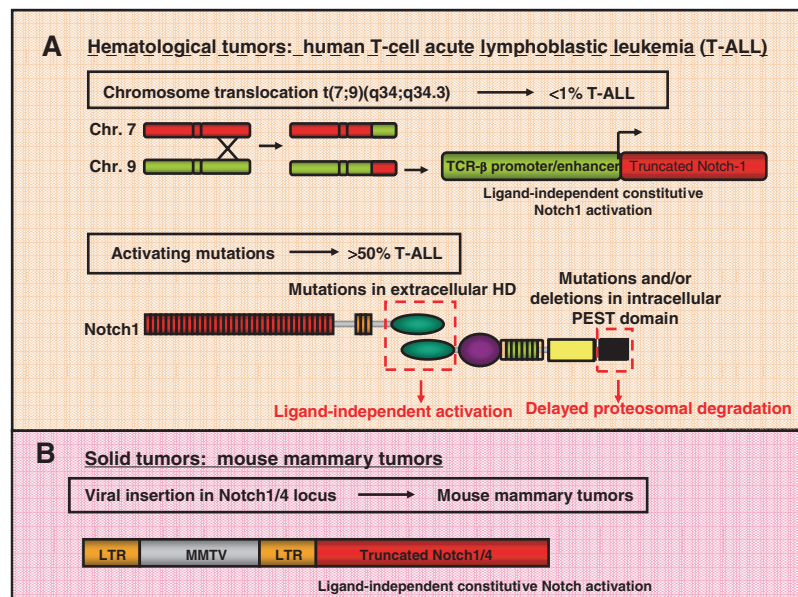

FIG. 6. Oncogenic Notch signaling in hematological malignancies and solid tumors. A, Chromosome translocations and activating mutations within the human NOTCH1 gene cause human T-ALL. The  $t(7;9)$  translocation in T-ALL patients is characterized by juxtaposition of the 3' portion of the human NOTCH1 gene with the T cell receptor  $\beta$  (TCR $\beta$ ) locus. This leads to expression of truncated NOTCH1 transcripts and consequent production of dominant active, ligand-independent forms of the NOTCH1 receptor, causing T-ALL. This rare event occurs in less than 1% of all T-ALL patients. Schematic diagram of the full-length human NOTCH1 protein, showing "hot spots" of mutations found in more than 50% of T-ALL patients. B, Integration of the MMTV between the LNRs and the transmembrane domain of the Notch1 or Notch4 gene cause mammary tumors in the mouse.

minimal PEST destruction box (Fig. 6A). The detection of mutations in multiple molecular subtypes of T-ALL is the basis for the conclusion that NOTCH1 appears to collaborate with various other proteins that are also deregulated in T-ALL (176). A recent study also identified c-MYC as an important direct target of NOTCH1 in T-ALL and in a critical stage of normal pre-T cell development, showing that c-MYC inhibitors interfere with progrowth effects of activated NOTCH1 and that forced c-MYC expression rescues NOTCH1-dependent T-ALL cell lines from Notch withdrawal (225). Based on these findings, a phase I/II clinical trial was recently begun using a NOTCH pathway inhibitor to treat patients with refractory T-ALL. If this trial is successful, NOTCH pathway inhibitors may soon be considered therapeutic agents that target cancer-specific molecular lesions (reviewed in Ref. 176).

Although the Notch receptor is expressed throughout the hematolymphoid compartment, its transforming potential appears to be restricted to developing T cells. Several studies have explored this issue in malignant B cells, with conflicting results; three reports suggest that constitutive Notch signaling in malignant B cells leads to growth inhibition and/or apoptosis (226–228), whereas three groups found that Notch signaling promotes malignant B cell proliferation (229–231). A recent study of the effect of constitutive Notch signaling in malignant murine and human B cells showed generalized Notch-mediated growth inhibition and apoptosis in immature and mature human and murine B cell malignancies, including therapy-resistant subtypes (232). This suggests that Notch signaling may be of therapeutic use for certain B cell tumors, although more research is still required.

#### B. Notch as an oncogene in solid tumors: breast and gut cancer

**1. Breast cancer.** Stem cells thought to reside in the mammary gland are thought to renew mammary gland cells through cycles of pregnancy, lactation, and involution during a woman's lifetime (233). There is increasing evidence that stem cells might be targets of transformation during mammary carcinogenesis. The Notch signaling pathway is implicated in the self-renewal of normal mammary stem cells (234, 235), and recent work suggests a role for the Notch pathway in breast cancer (236). Notch4 was identified as a mouse mammary tumor virus (MMTV) insertion site in mammary tumors (Fig. 6B); provirus was inserted within the *Notch4* gene (originally known as the *int-3* locus) (237). This MMTV model system has proven useful for identification and characterization of genes involved in malignant transformation of normal mammary epithelium (238). In the case of the *Notch4* gene, provirus insertion leads to expression of a truncated Notch that lacks most of the extracellular portion of the protein but contains Notch4 transmembrane and intracellular domains (N4ICD) (239). Transgenic mice harboring this constitutively active N4ICD under the regulation of the MMTV promoter show arrested mammary gland development and eventually develop poorly differentiated adenocarcinomas (237). Additional evidence confirms the *Notch4/int-3* gene effect in mammary epithelial differentiation and mammary tumorigenesis; this is derived from studies in which N4ICD was expressed from the whey acidic protein (WAP) promoter in transgenic mice, which restricts its activity to secretory mammary epithelial cells of pregnant mice (240). As predicted, secretory lobule growth and differenti-



ation were inhibited, and mammary tumors were histologically identical to MMTV-*N4ICD* tumors. Other workers subsequently identified a 1.8-kb human NOTCH4/*Int3* RNA species (designated h-*Int3sh*). *h-Int3sh* RNA encodes a protein lacking the CBF1-binding region (RAM23) of the NOTCH4/*Int3* intracellular domain. Although WAP-*Int3sh* transgenic mouse lines develop mammary tumors, the latency period is long (241); the authors thus speculate that the *N4ICD*-induced block of mammary gland development and tumorigenesis is the result of an increasing CBF1-dependent NOTCH4/*Int3* signaling gradient.

Notch1 involvement in mammary tumorigenesis is being studied extensively. The first evidence that aberrant Notch1 signaling has a role in mammary tumorigenesis came from studies in the MMTV model, which attempted to identify genes that collaborate with *Neu/erbB2* in mammary tumorigenesis (Fig. 6B). An MMTV insertion in the *Notch1* locus in MMTV-*Neu* mammary tumors causes N1ICD expression (242). HC11 mouse mammary epithelial cells expressing N1ICD-encoding cDNA are transformed, form colonies in agar, but are unable to form tumors in nude mice, indicating that acquisition of malignant characteristics requires additional genetic events (242). Other studies showed that transgenic activation of N1ICD in mammary glands leads to development of lactation-dependent tumors that regress at weaning (207, 208); with time, these regressing neoplasms apparently become nonregressing adenocarcinomas (207). Recent evidence shows that *c-myc* is a direct transcriptional target of aberrant Notch1 signaling, with a fundamental role in MMTV-N1ICD-induced murine mammary tumorigenesis (243).

The study of *NUMB* expression in human breast cancer also supports NOTCH signaling pathway involvement in breast cancer. Pece *et al.* (244) showed that *NUMB*-mediated negative regulation of NOTCH signaling is lost in 50% of human mammary carcinomas. This is due to specific *NUMB* ubiquitination and proteasomal degradation (244) and indicates that enhanced NOTCH signaling activity occurs in these mammary carcinomas. NOTCH1 is also implicated as a downstream effector of oncogenic Ras in human mammary tumorigenesis (245). H-Ras is thought to have a central role early in human mammary carcinogenesis (246). The Ras signaling network and its mediators in human neoplastic cells thus have considerable importance for the development of antineoplastic agents for breast cancer (247). Weijzen *et al.* (245) suggested that N1ICD mediates the tumorigenic effects of oncogenic Ras. Analysis of several human breast cancer cases showed high NOTCH1 expression in all Ras-positive tumors. The authors also show that *NOTCH1* down-regulation in Ras-transformed human cells led to a marked decrease in cell proliferation, and inhibition of Ras signaling blocked N1ICD up-regulation, indicating that Ras acts upstream of NOTCH1. Nonetheless, they showed that N1ICD overexpression in the absence of oncogenic Ras was consistently unstable in human cell lines that do not bear Ras mutations. In addition, expression of oncogenic Ras leads to higher *DELTA1* and *PRESENILIN1* protein levels, which may increase NOTCH1 processing (245).

Another study showed that Notch4 also requires Ras signaling to exert its oncogenic effect (248), whereas Notch

antagonism by transgenic expression of *Deltex* affects H-Ras-induced mammary tumorigenesis (207). Crossing MMTV/*v-H-Ras* and MMTV-DTX1 mice and monitoring the bitransgenic progeny for tumor development showed that *Deltex* expression greatly inhibited the oncogenic effects of H-Ras expression in mammary glands (207). The authors also showed that in MMTV-H-Ras mice (which eventually will develop mammary tumors), H-Ras induced *cyclin D1* up-regulation, even in a precancerous state. In contrast, the H-Ras/hDTX1 bitransgenic mice showed a marked reduction in the amount of cyclin D1 compared with MMTV-H-Ras mice. These results would be consistent with the finding that N1ICD expression activates *cyclin D1* gene transcription in cultured human cells (249) and that mice lacking *cyclin D1* were resistant to development of H-Ras- or Neu/Erb2-induced mammary tumors (250). Recent work also suggests a relationship between WNT and NOTCH pathways in breast tumorigenesis. Ectopic WNT-1 expression in human mammary epithelial cells increases WNT signaling and produces a tumorigenic state via a NOTCH-dependent mechanism (251). This suggests that deregulation of WNT signaling is an early event in NOTCH-dependent mammary epithelial transformation.

Other groups are using gene expression profile analysis to test the correlation of NOTCH pathway components, clinical outcome, and tumor clinicopathological parameters in human breast cancer. In tissue samples from breast cancer patients, Parr *et al.* (252) quantified NOTCH1 and NOTCH2 expression in association with clinical outcome and showed aberrant NOTCH1 and NOTCH2 levels in breast cancer tissues compared with normal breast tissue. Examination of the clinicopathological parameters for breast cancer patients indicated that high NOTCH1 levels may be associated with poor prognosis, whereas increased NOTCH2 levels correlated with greater probability of survival (252). NOTCH1 may thus have tumor-promoting functions, whereas NOTCH2 could have a tumor-suppressive role in human breast cancer, supporting the suppression of NOTCH-1 activity as a therapeutic strategy. Tissue microarray studies showed high *JAGGED1* and/or *NOTCH1* expression levels in human breast cancer, associated with poor overall survival compared with patients with low levels of these genes (253). Because high-level *JAGGED1* and *NOTCH1* coexpression showed a synergistic effect on overall survival, this type of breast tumor could also benefit from  $\gamma$ -secretase inhibitor-based therapy.

Recent evidence suggests an antiapoptotic role for the NOTCH pathway in human breast cancer. An increase in RBP-JK-dependent NOTCH signaling in the normal human breast cell line MCF 10A thus protects them from drug-induced apoptosis by abolishing the p53-mediated response (212). Other authors show that NOTCH1 signaling confers chemoresistance by inhibiting p53 activation of transcription and thus, apoptosis (254).

2. *Gut cancer.* As we have seen in Section V.B, Notch is essential for gut development and homeostasis. The Wnt cascade is also implicated in crypt progenitor cell maintenance; it is considered a major force behind the proliferative potential of intestinal adenomas and adenocarcinomas (179). In

their study of the role of Notch signaling in intestine development and cancer, van Es *et al.* (183) showed that the Wnt signaling pathway remained active in *RBPJK<sup>floxex/floxex</sup>; P450-Cre* mutant mice. Their data indicated that Notch might function downstream of Wnt in the intestine and that both pathways may synergize as gatekeepers in the intestinal epithelium. This study also showed that spontaneous adenomas in *Apc<sup>Min</sup>* (multiple intestine neoplasia) mutant mice have high *Hes-1* expression levels, similar to the intestinal crypts. The Notch pathway is thus activated in intestinal adenomas in these mice, as is the Wnt cascade (175). Notch pathway inhibition by  $\gamma$ -secretase inhibitors in *Apc<sup>Min</sup>* mice induces goblet cell differentiation and reduces adenoma proliferation (183). Taken together, these data indicate that maintenance of undifferentiated, proliferative cells in crypts and adenomas requires activation of the Notch pathway in concert with the Wnt cascade. They also suggest that Notch signaling could provide an alternative target-drug strategy for intestinal neoplastic disease therapy (183). Thus, NOTCH and WNT inhibitors could be combined in an approach for colorectal neoplasia treatment (211).

### C. Differential roles of NOTCH in two types of skin cancer: keratinocyte-derived carcinoma and melanomas

In human primary keratinocytes, increased NOTCH1 activity promotes commitment of self-renewing stem cells to transit-amplifying populations that continue to proliferate, although only for a limited time (255). In primary mouse keratinocytes, Notch acts as a tumor suppressor gene, promoting exit from the cell cycle and entry into differentiation (256, 257). Conditional ablation of *Notch1* in murine epidermis results in epidermal hyperplasia, skin carcinoma (basal cell carcinoma-like tumors), and facilitation of chemical-induced skin carcinogenesis. This is explained in part by reduced *p21<sup>Waf1/Cip1</sup>* protein levels (257), because *p21<sup>Waf1/Cip1</sup>−/−* mice are also more sensitive to chemical-induced carcinogenesis (258). Indeed, *Notch1* mutant keratinocytes are highly susceptible to *ras* oncogene malignant transformation; *Notch1* mutant cells infected with a retrovirus transducing the *ras* oncogene and injected sc into nude mice form aggressive squamous cell carcinoma (SCC), whereas wild-type cells do not (257). Loss of Notch1 activity may thus cooperate with *ras* oncogene transformation in keratinocyte tumor development. Accordingly, conditional transgenic mice with epidermal-restricted inhibition of Notch signaling (SM22-Cre<sup>+</sup>; DNMA11<sup>+</sup> mice) have a hyperplastic epidermis and develop both spontaneous SCC and dysplastic precursor lesions (259); these mice also show enhanced accumulation of nuclear  $\beta$ -catenin and cyclin D1 in suprabasilar keratinocytes and in lesional cells from SCC, as also observed in human SCC (259).

The antioncogenic effect of Notch1 in murine skin appears to be mediated by *p21<sup>Waf1/Cip1</sup>* induction and by repression of Shh and Wnt signaling (Fig. 7) (45, 257, 260). Notch1 induces *p21<sup>Waf1/Cip1</sup>* expression directly by targeting NICD/RBPJK to the *p21<sup>Waf1/Cip1</sup>* promoter (256) and indirectly through the calcineurin/NFAT (nuclear factor of activated T cells) pathway (Fig. 7) (261). Mice with skin-specific *Notch1*

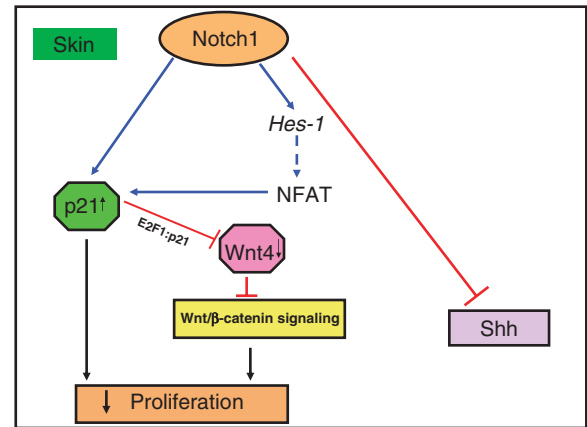

FIG. 7. Tumor suppressive Notch signaling pathway in the skin. Activation of Notch modulates signaling pathways that inhibit proliferation, preventing neoplastic transformation. The diagram shows functional and/or biochemical interactions (discussed in the text). NFAT, Nuclear factor of activated T cells.

deletion develop spontaneous basal cell carcinoma-like tumors; human basal cell carcinomas also show reduced *NOTCH1*, *NOTCH2*, and *JAGGED1* expression (260). In mice and in man, this tumor type is frequently associated with aberrant Shh signaling. Consistent with this, *Notch1* deletion in the mouse epidermis leads to aberrant expression of *Gli2*, a downstream component of the Shh pathway. Loss of NOTCH in human epidermis could also lead to aberrant SHH signaling, thus contributing to the development of basal cell carcinomas (Fig. 7).

Wnt signaling is suppressed by Notch1 activation and is elevated in keratinocytes and tumors as a consequence of loss of Notch1 function (257). Increased Wnt/ $\beta$ -catenin signaling is biologically important because it is associated with maintenance of keratinocytes in their stem cell compartment (262) and with keratinocyte-derived malignancies (263). Devgan *et al.* (45) recently established the mechanism for Wnt signaling suppression by Notch1 activation in keratinocytes, showing that Notch1 activation down-regulates this pathway by suppressing *Wnt-4* expression. *p21<sup>Waf1/Cip1</sup>* mediates this negative regulation; Notch1 activation increases levels of *p21<sup>Waf1/Cip1</sup>* protein, which subsequently associates with E2F1 transcription factors at the *Wnt4* promoter, down-regulating *Wnt4* expression (Fig. 7) (45). The function of Notch signaling in epidermis and in keratinocytes is thus to induce terminal differentiation processes, as well as to withdraw proliferating cells from the cell cycle. A long-term consequence of *Notch1* deletion in murine skin is the development of basal cell carcinoma-like tumors, suggesting that Notch exerts tumor-suppressive functions in this tissue.

Melanoma is a skin cancer that originates from melanocytes. In human skin, melanocytes are positioned at the epidermal-dermal junction and are interspersed among the basal keratinocytes (264). Melanocytes are tightly controlled by keratinocytes and maintain a nonproliferative status. Transformation to melanoma is the pathological consequence of disruption of cell control, which is environmentally initiated and is linked to specific genetic aberrations.

Recent data suggest that NOTCH signaling does not inhibit melanoma as it does in keratinocyte-derived carcinoma (260). *In vivo* and *in vitro* experiments show that NOTCH1 activation is insufficient to transform melanocytes but enables primary melanoma cells to gain metastatic capability (265). This oncogenic role of NOTCH is stage-specific. Thus, NOTCH signaling advances primary melanoma but has little effect on metastatic melanoma (265). A novel mechanism for NOTCH signaling in melanoma progression has been defined in which the oncogenic effect of NOTCH1 on primary melanoma cells is mediated by  $\beta$ -CATENIN, which is up-regulated after NOTCH1 activation. Inhibiting  $\beta$ -CATENIN expression reverses NOTCH1-enhanced tumor growth and metastasis. In primary melanoma cells,  $\beta$ -CATENIN thus acts as a downstream target of NOTCH1 signaling (265). Concurring with these findings, another report showed that NOTCH1 promotes primary melanoma progression by activating MAPK/PI3K-AKT survival pathways and up-regulating N-CADHERIN expression (266). NOTCH1 also down-regulates microtubule-associated protein 2 expression in primary melanoma cell lines (267). Abundant microtubule-associated protein 2 is often associated with longer disease-free survival rate in melanoma patients (268). Although previous work showed that NOTCH1 has a critical role in melanoma progression, the involvement of other NOTCH family members is not excluded. NICD are expressed in primary lesions of human malignant melanoma (reviewed in Ref. 209). *NOTCH2* and *HEY1* genes are also up-regulated in melanomas compared with melanocytes (269).

These data indicate that NOTCH signaling is implicated in primary melanoma progression and suggest that certain members of the NOTCH pathway are potential therapeutic targets in the development of new melanoma treatments. Qin *et al.* (270) showed that  $\gamma$ -secretase inhibitors can induce apoptosis in melanoma cell lines with markedly enhanced levels of activated NOTCH1 receptor.  $\gamma$ -Secretase inhibitor treatment triggers apoptosis in melanoma cells but only causes G<sub>2</sub>/M growth arrest in melanocytes, without subsequent cell death (270); this treatment also induced the proapoptotic BH3-only protein NOXA in melanoma cells, but not in normal melanocytes (Ref. 270; reviewed in Ref. 271).

#### D. Notch in EMT and tumor progression

EMT is a fundamental process that implies loss of cell polarity and intercellular adhesion, as well as acquisition of a migratory phenotype, leading to mesenchymal cell formation from primitive epithelium. EMT takes place during critical phases of embryonic development such as gastrulation or the formation of the cardiac valve primordium (see Section IV). EMT also occurs during tumor progression when cells from a primary epithelial tumor change phenotype, become mesenchymal, and disseminate as single carcinoma cells, invading other organs and leading to tumor metastasis. EMT might also be involved in the dedifferentiation program that leads to malignant carcinoma (272, 273). The mechanisms underlying EMT are under intense study, and it is clear that developmental and metastatic EMT are governed by the same signaling pathways (272, 273).

Loss of expression of the epithelial adhesion protein E-

CADHERIN indicates progression from an *in situ* to an invasive carcinoma (274). In most differentiated tumors, E-CADHERIN production is maintained, and there is an inverse correlation between E-CADHERIN levels and cancer grade or patient survival (274, 275). In accordance, a causal role has been established for E-cadherin loss in the transition from adenoma to carcinoma in mouse models (276). Transcription factors detected at EMT sites during embryonic development were recently identified as key transcriptional repressors of *E-cadherin* expression during tumor progression (277). One of these molecules is the zinc finger protein SNAI1 (SNAI1), an *E-CADHERIN* repressor; carcinoma cell lines lacking E-CADHERIN produce considerable amounts of SNAI1, and E-CADHERIN-positive cell lines transfected with *SNAI1* undergo EMT (278, 279). We previously showed that Notch is critical for promotion of EMT during cardiac valve development via *Snai1* induction (see Ref. 140 and Section IV), and that N1ICD overexpression in immortalized porcine aortic endothelial (PAE) cells induces EMT, with induction of *Snai1* and repression of *VE-cadherin* (140). The data indicated that Notch is upstream of *Snai1* in the EMT process that generates the valve primordia and in the PAE system. Other authors showed that JAGGED1 activation of endogenous NOTCH receptors in human endothelial cells also promoted EMT as endothelial cells expressing activated NOTCH1 or NOTCH4 repressed VE-CADHERIN (280). NOTCH might thus be implicated in EMT during tumor progression, potentially via SNAI1 induction. After stable expression of N1ICD or an RBP-JK/VP16 fusion protein, the normal human breast cell line MCF 10A showed marked changes in cell shape associated with a reduction in E-CADHERIN protein levels (212). N1ICD induction in the human adenocarcinoma cell line MCF7 promotes migratory behavior associated with E-CADHERIN loss (our unpublished observations).

TGF $\beta$  is another well-known inducer of EMT during embryonic development and the later stages of tumor progression. During early tumor development, however, TGF $\beta$  inhibits the growth of most epithelial cell types, acting as a tumor suppressor (272). Another mechanism of NOTCH-induced tumor development and progression may involve modulation of the TGF $\beta$  signaling pathway. N1ICD was recently shown to suppress the growth-inhibitory effects of TGF $\beta$  by sequestering the transcriptional coactivator p300 from SMAD3, a downstream effector of TGF $\beta$  (281). Moreover, N4ICD binds directly to and inhibits SMAD2, SMAD3, and SMAD4 signaling activity, resulting in attenuated TGF $\beta$  signaling in MCF-7 breast cancer cells (282). Cells with activated NOTCH might thus be resistant to the growth inhibitory effects of TGF $\beta$ , promoting tumor development. Another recent study shows that RNA silencing of HEY-1 or JAGGED-1 or the chemical inactivation of NOTCH inhibits TGF $\beta$ -induced EMT in human keratinocytes (283). The ability of TGF $\beta$  to induce EMT may thus be Notch signaling-dependent. The authors also found that TGF $\beta$  induces HEY1 and JAGGED1 expression at the onset of EMT in epithelial cells from mammary gland, kidney tubules, and epidermis. The HEY1 expression profile is biphasic, consisting of immediate-early SMAD3-dependent, NOTCH-independent activation, followed by delayed JAGGED1/NOTCH-depen-



dent activation (283). In our PAE system, N1ICD did not appear to affect TGF $\beta$  signaling, suggesting that Notch signaling may be TGF $\beta$ -independent in this setting (140). Distinct pathways and/or transcription factors might thus participate in EMT via *E-cadherin* repression in distinct cell lines and tumor types.

A study based on immunohistochemical analysis of human prostate tumors suggests a role for the NOTCH pathway in prostate cancer metastasis (284). JAGGED1 expression is notably higher in metastatic prostate cancer than in localized prostate cancer or benign prostate tissues. This finding supports a model in which dysregulation of JAGGED1 protein levels plays a role in prostate cancer progression and metastasis and suggests that JAGGED1 may be a useful marker to distinguish slow-progressing from aggressive prostate cancers (284). Although genomic studies show that expression of NOTCH pathway components is increased in a variety of solid tumors (285), a systematic search comparing the expression status of NOTCH pathway elements and potential target genes in metastatic and non-metastatic tumors remains to be carried out.

## VII. Concluding Remarks

Notch is a key regulator of many developmental processes during embryonic and adult life. In the embryo, Notch activity via lateral inhibition or induction mechanisms generates molecular differences between adjacent cells. In the vertebrate CNS, Notch maintains the neural progenitor state and inhibits differentiation. In contrast, during gliogenesis Notch seems to have an instructive role, directly promoting the differentiation of different glial subtypes. More detailed analyses have also revealed that Notch regulates progenitor pool diversification and neuronal maturation. Emerging data suggest that Notch signaling has a role in neuronal function in the adult brain.

During somitogenesis, spatial and temporal changes in Notch signaling in the PSM are linked to segmental clock activity and are critical for segmental patterning. Oscillatory gene expression in the PSM is likely to involve Notch activation of *Hes* genes that negatively feed back on their own transcription, as well as the expression of ligands and/or Lfng. A major question is how the transition occurs between oscillatory Notch activity in the caudal PSM to fixed Notch activity in the anterior PSM.

During vascular development, Notch is dispensable for vasculogenesis but is essential to establish the arterial endothelial fate and for angiogenesis, suggesting that arterial/venous specification may be important for proper vascular remodeling. In addition, the vein phenotype is not achieved by default but rather requires the inhibition of Notch activity in presumptive vein territory. Studies in humans with vascular pathologies involving NOTCH suggest that this pathway may be required to maintain or stabilize the cells that contribute to blood vessels.

In the heart, Notch is not necessary to establish the primary cardiac fates *in vivo*, but its activity regulates crucial cell communication events between endocardium and myocardium during both the formation of the valve primordial and

ventricular development and differentiation. Human studies indicate that NOTCH is critical for cardiac valve homeostasis, and more information about the implication of NOTCH in other human disorders involving the cardiovascular system is likely to come soon.

During pancreas development, Notch is required for timely cell lineage specification of both endocrine and exocrine pancreas.

In the gut, Notch and Wnt have a gatekeeper function for crypt progenitor cells, and Notch appears to influence binary fate decisions of cells that must choose between the secretory and absorptive lineages. Deregulation of the Wnt pathway is central to the development of colorectal cancers in man. It remains to be shown whether Notch deregulation also follows the Wnt cascade in this respect.

In bone development, Notch may expand the HSC compartment and participate in commitment to the osteoblastic lineage, suggesting a potential therapeutic role for Notch in bone regeneration and osteoporosis.

Aberrant Notch activity is involved in hematological and solid tumor formation. The best-established role of Notch within the hematopoietic system is the ability to influence and/or specify cell fates of lymphoid progenitors. It has become clear that aberrant Notch signaling in humans due to activating mutations in the NOTCH1 receptor promotes T-ALL. Notch1 is thus an established oncogene in the hematopoietic system.

The evidence suggests that Notch signaling activity has an oncogenic role in human breast cancer, which may be facilitated by cooperation with other signaling pathways such as Neu/ErbB2 and WNT. Deregulated NUMB activity also supports NOTCH involvement in breast cancer, where it acts as a downstream effector of Ras.

This contrasts dramatically with Notch1 function in the skin, where Notch1 appears to induce terminal differentiation and also acts as a tumor suppressor. The observation that Notch can have such opposite functions in different self-renewing organs indicates that the outcome of Notch activation depends to a great extent on the cell context and factors such as the cell type in which Notch is activated, the specific growth factors in the microenvironment, and the level of Notch activity.

During embryonic development, the question is basically the same: How does Notch integrate its activity with other cell inputs to control specific developmental events? Another important matter is to understand how Notch activates distinct target genes according to cell type and time. Genomic studies will undoubtedly increase the spectrum of target genes and allow development of a systematic approach for understanding these different responses. Deregulated Notch signaling activity is involved in disease, but it remains to be determined whether modulation of such a pleiotropic pathway can be a therapeutic target for cancer and in regenerative medicine.

## Acknowledgments

We thank C. Mark for editorial assistance.

Address requests for reprints to: José Luis de la Pompa, Departamento de Inmunología y Oncología, Centro Nacional de Biotecnología/Con-

sejo Superior de Investigaciones Científicas, Darwin 3, Campus de Cantoblanco, E-28049 Madrid, Spain. E-mail: jlpompa@cnb.uam.es

This work was supported by Grants SAF2004-05204 (Spanish Ministry of Education and Science), GR/SAL/0851/2004 and 200520M072 (Regional Government of Madrid), and LSHM-CT-2005-018630 (European Union 6th FP). The Department of Immunology and Oncology was founded and is supported by the Spanish National Research Council (CSIC) and by Pfizer. J.G.-B. was partially supported by a basic and clinical research fellowship from the Spanish Society for Cardiology.

The authors declare no conflict of economic interests with regard to this publication.

## References

- Morgan TH 1917 The theory of the gene. *Am Nat* 51:513–544
- Poulson DF 1937 Chromosomal deficiencies and the embryonic development of *Drosophila melanogaster*. *Proc Natl Acad Sci USA* 23:133–137
- Welshons WJ, Von Halle ES 1962 Pseudoallelism at the notch locus in *Drosophila*. *Genetics* 47:743–759
- Wharton KA, Johansen KM, Xu T, Artavanis-Tsakonas S 1985 Nucleotide sequence from the neurogenic locus notch implies a gene product that shares homology with proteins containing EGF-like repeats. *Cell* 43:567–581
- Kidd S, Kelley MR, Young MW 1986 Sequence of the notch locus of *Drosophila melanogaster*: relationship of the encoded protein to mammalian clotting and growth factors. *Mol Cell Biol* 6:3094–3108
- Del Amo FF, Smith DE, Swiatek PJ, Gendron-Maguire M, Greenspan RJ, McMahon AP, Gridley T 1992 Expression pattern of Notch, a mouse homolog of *Drosophila Notch*, suggests an important role in early postimplantation mouse development. *Development* 115:737–744
- Weinmaster G, Roberts VJ, Lemke G 1992 Notch2: a second mammalian Notch gene. *Development* 116:931–941
- Lardelli M, Lendahl U 1993 Notch A and notch B—two mouse Notch homologues coexpressed in a wide variety of tissues. *Exp Cell Res* 204:364–372
- Lardelli M, Dahlstrand J, Lendahl U 1994 The novel Notch homologue mouse Notch 3 lacks specific epidermal growth factor-repeats and is expressed in proliferating neuroepithelium. *Mech Dev* 46:123–136
- Uyttendaele H, Marazzi G, Wu G, Yan Q, Sassoon D, Kitajewski J 1996 Notch4/int-3, a mammary proto-oncogene, is an endothelial cell-specific mammalian Notch gene. *Development* 122:2251–2259
- Fehon RG, Kooh PJ, Rebay I, Regan CL, Xu T, Muskavitch MA, Artavanis-Tsakonas S 1990 Molecular interactions between the protein products of the neurogenic loci Notch and Delta, two EGF-homologous genes in *Drosophila*. *Cell* 61:523–534
- Rebay I, Fleming RJ, Fehon RG, Cherbas L, Cherbas P, Artavanis-Tsakonas S 1991 Specific EGF repeats of Notch mediate interactions with Delta and Serrate: implications for Notch as a multifunctional receptor. *Cell* 67:687–699
- Tamura K, Taniguchi Y, Minoguchi S, Sakai T, Tun T, Furukawa T, Honjo T 1995 Physical interaction between a novel domain of the receptor Notch and the transcription factor RBP-J  $\kappa$ /Su(H). *Curr Biol* 5:1416–1423
- Blank V, Kourilsky P, Israel A 1992 NF- $\kappa$ B and related proteins: Rel/dorsal homologues meet ankyrin-like repeats. *Trends Biochem Sci* 17:135–140
- Rechsteiner M 1988 Regulation of enzyme levels by proteolysis: the role of pest regions. *Adv Enzyme Regul* 27:135–151
- Logeat F, Bessia C, Brou C, LeBail O, Jarriault S, Seidah NG, Israel A 1998 The Notch1 receptor is cleaved constitutively by a furin-like convertase. *Proc Natl Acad Sci USA* 95:8108–8112
- Blaumueller CM, Qi H, Zagouras P, Artavanis-Tsakonas S 1997 Intracellular cleavage of Notch leads to a heterodimeric receptor on the plasma membrane. *Cell* 90:281–291
- Bettenhausen B, Hrabe de Angelis M, Simon D, Guenet JL, Gosler A 1995 Transient and restricted expression during mouse embryogenesis of Dll1, a murine gene closely related to *Drosophila* Delta. *Development* 121:2407–2418
- Dunwoodie SL, Henrique D, Harrison SM, Beddington RS 1997 Mouse Dll3: a novel divergent Delta gene which may complement the function of other Delta homologues during early pattern formation in the mouse embryo. *Development* 124:3065–3076
- Shutter JR, Scully S, Fan W, Richards WG, Kitajewski J, Deblandre GA, Kintner CR, Stark KL 2000 Dll4, a novel Notch ligand expressed in arterial endothelium. *Genes Dev* 14:1313–1318
- Lindsell CE, Shawber CJ, Boulter J, Weinmaster G 1995 Jagged: a mammalian ligand that activates Notch1. *Cell* 80:909–917
- Shawber C, Boulter J, Lindsell CE, Weinmaster G 1996 Jagged2: a serrate-like gene expressed during rat embryogenesis. *Dev Biol* 180:370–376
- Moloney DJ, Panin VM, Johnston SH, Chen J, Shao L, Wilson R, Wang Y, Stanley P, Irvine KD, Haltiwanger RS, Vogt TF 2000 Fringe is a glycosyltransferase that modifies Notch. *Nature* 406:369–375
- Bruckner K, Perez L, Clausen H, Cohen S 2000 Glycosyltransferase activity of Fringe modulates Notch-Delta interactions. *Nature* 406:411–415
- Panin VM, Papayannopoulos V, Wilson R, Irvine KD 1997 Fringe modulates Notch-ligand interactions. *Nature* 387:908–912
- Shao L, Moloney DJ, Haltiwanger R 2003 Fringe modifies O-fucose on mouse Notch1 at epidermal growth factor-like repeats within the ligand-binding site and the Abruption region. *J Biol Chem* 278:7775–7782
- Haltiwanger RS 2002 Regulation of signal transduction pathways in development by glycosylation. *Curr Opin Struct Biol* 12:593–598
- Itoh M, Kim CH, Palardy G, Oda T, Jiang YJ, Maust D, Yeo SY, Lorick K, Wright GJ, Ariza-McNaughton L, Weissman AM, Lewis J, Chandrasekharappa SC, Chitnis AB 2003 Mind bomb is a ubiquitin ligase that is essential for efficient activation of Notch signaling by Delta. *Dev Cell* 4:67–82
- Le Borgne R, Schweisguth F 2003 Notch signaling: endocytosis makes delta signal better. *Curr Biol* 13:R273–R275
- Lai EC, Deblandre GA, Kintner C, Rubin GM 2001 *Drosophila* neuralized is a ubiquitin ligase that promotes the internalization and degradation of delta. *Dev Cell* 1:783–794
- Deblandre GA, Lai EC, Kintner C 2001 *Xenopus* neuralized is a ubiquitin ligase that interacts with XDelta1 and regulates Notch signaling. *Dev Cell* 1:795–806
- Pavlopoulos E, Pitsouli C, Klueg KM, Muskavitch MA, Moschonas NK, Delidakis C 2001 Neuralized encodes a peripheral membrane protein involved in delta signaling and endocytosis. *Dev Cell* 1:807–816
- Mumm JS, Schroeter EH, Saxena MT, Griesemer A, Tian X, Pan DJ, Ray WJ, Kopan R 2000 A ligand-induced extracellular cleavage regulates  $\gamma$ -secretase-like proteolytic activation of Notch1. *Mol Cell* 5:197–206
- Parks AL, Klueg KM, Stout JR, Muskavitch MA 2000 Ligand endocytosis drives receptor dissociation and activation in the Notch pathway. *Development* 127:1373–1385
- Kopan R, Goate A 2002 Aph-2/Nicastrin: an essential component of  $\gamma$ -secretase and regulator of Notch signaling and presenilin localization. *Neuron* 33:321–324
- Morel V, Lecourtis M, Massiani O, Maier D, Preiss A, Schweisguth F 2001 Transcriptional repression by suppressor of hairless involves the binding of a hairless-dCtBP complex in *Drosophila*. *Curr Biol* 11:789–792
- Kao HY, Ordentlich P, Koyano-Nakagawa N, Tang Z, Downes M, Kintner CR, Evans RM, Kadesch T 1998 A histone deacetylase corepressor complex regulates the Notch signal transduction pathway. *Genes Dev* 12:2269–2277
- Oswald F, Winkler M, Cao Y, Astrahantseff K, Bourtelee S, Knoche W, Borggrete T 2005 RBP-J $\kappa$ /SHARP recruits CtBP/CtBP corepressors to silence Notch target genes. *Mol Cell Biol* 25:10379–10390
- Wu L, Aster JC, Blacklow SC, Lake R, Artavanis-Tsakonas S, Griffin JD 2000 MAML1, a human homologue of *Drosophila* mastermind, is a transcriptional co-activator for NOTCH receptors. *Nat Genet* 26:484–489
- Kurooka H, Honjo T 2000 Functional interaction between the mouse notch1 intracellular region and histone acetyltransferases PCAF and GCN5. *J Biol Chem* 275:17211–17220
- Takeyama K, Aguiar RC, Gu L, He C, Freeman GJ, Kutok JL, Aster

- JC, Shipp MA 2003 The BAL-binding protein BBAP and related Deltex family members exhibit ubiquitin-protein isopeptide ligase activity. *J Biol Chem* 278:21930–21937
42. Hori K, Fostier M, Ito M, Fuwa TJ, Go MJ, Okano H, Baron M, Matsuno K 2004 *Drosophila* deltex mediates suppressor of hairless-independent and late-endosomal activation of Notch signaling. *Development* 131:5527–5537
  43. Cayouette M, Raff M 2002 Asymmetric segregation of Numb: a mechanism for neural specification from *Drosophila* to mammals. *Nat Neurosci* 5:1265–1269
  44. Iso T, Kedes L, Hamamori Y 2003 HES and HERP families: multiple effectors of the Notch signaling pathway. *J Cell Physiol* 194: 237–255
  45. Devgan V, Mammucari C, Millar SE, Briskin C, Dotto GP 2005 p21WAF1/Cip1 is a negative transcriptional regulator of Wnt4 expression downstream of Notch1 activation. *Genes Dev* 19:1485–1495
  46. Krebs LT, Deftos ML, Bevan MJ, Gridley T 2001 The Nrarp gene encodes an ankyrin-repeat protein that is transcriptionally regulated by the Notch signaling pathway. *Dev Biol* 238:110–119
  47. Radtke F, Wilson A, Mancini SJ, MacDonald HR 2004 Notch regulation of lymphocyte development and function. *Nat Immunol* 5:247–253
  48. Mumm JS, Kopan R 2000 Notch signaling: from the outside in. *Dev Biol* 228:151–165
  49. Fortini ME 2002  $\gamma$ -Secretase-mediated proteolysis in cell-surface-receptor signalling. *Nat Rev Mol Cell Biol* 3:673–684
  50. Baron M 2003 An overview of the Notch signalling pathway. *Semin Cell Dev Biol* 14:113–119
  51. Bray SJ 2006 Notch signalling: a simple pathway becomes complex. *Nat Rev Mol Cell Biol* 7:678–689
  52. Baker NE 2000 Notch signaling in the nervous system. Pieces still missing from the puzzle. *Bioessays* 22:264–273
  53. Swiatek PJ, Lindsell CE, del Amo FF, Weinmaster G, Gridley T 1994 Notch1 is essential for postimplantation development in mice. *Genes Dev* 8:707–719
  54. Conlon RA, Reaume AG, Rossant J 1995 Notch1 is required for the coordinate segmentation of somites. *Development* 121:1533–1545
  55. de la Pompa JL, Wakeham A, Correia KM, Samper E, Brown S, Aguilera RJ, Nakano T, Honjo T, Mak TW, Rossant J, Conlon RA 1997 Conservation of the Notch signalling pathway in mammalian neurogenesis. *Development* 124:1139–1148
  56. Ishibashi M, Ang SL, Shiota K, Nakanishi S, Kageyama R, Guillemot F 1995 Targeted disruption of mammalian hairy and Enhancer of split homolog-1 (HES-1) leads to up-regulation of neural helix-loop-helix factors, premature neurogenesis, and severe neural tube defects. *Genes Dev* 9:3136–3148
  57. Kageyama R, Nakanishi S 1997 Helix-loop-helix factors in growth and differentiation of the vertebrate nervous system. *Curr Opin Genet Dev* 7:659–665
  58. Hamada Y, Kadokawa Y, Okabe M, Ikawa M, Coleman JR, Tsujimoto Y 1999 Mutation in ankyrin repeats of the mouse Notch2 gene induces early embryonic lethality. *Development* 126:3415–3424
  59. McCright B, Gao X, Shen L, Lozier J, Lan Y, Maguire M, Herzlinger D, Weinmaster G, Jiang R, Gridley T 2001 Defects in development of the kidney, heart and eye vasculature in mice homozygous for a hypomorphic Notch2 mutation. *Development* 128:491–502
  60. Krebs LT, Xue Y, Norton CR, Sundberg JP, Beatus P, Lendahl U, Joutel A, Gridley T 2003 Characterization of Notch3-deficient mice: normal embryonic development and absence of genetic interactions with a Notch1 mutation. *Genesis* 37:139–143
  61. Krebs LT, Xue Y, Norton CR, Shutter JR, Maguire M, Sundberg JP, Gallahan D, Closson V, Kitajewski J, Callahan R, Smith GH, Stark KL, Gridley T 2000 Notch signaling is essential for vascular morphogenesis in mice. *Genes Dev* 14:1343–1352
  62. Radtke F, Wilson A, Stark G, Bauer M, van Meerwijk J, MacDonald HR, Aguet M 1999 Deficient T cell fate specification in mice with an induced inactivation of Notch1. *Immunity* 10:547–558
  63. Lutolf S, Radtke F, Aguet M, Suter U, Taylor V 2002 Notch1 is required for neuronal and glial differentiation in the cerebellum. *Development* 129:373–385
  64. Yang X, Klein R, Tian X, Cheng HT, Kopan R, Shen J 2004 Notch activation induces apoptosis in neural progenitor cells through a p53-dependent pathway. *Dev Biol* 269:81–94
  65. Yoon K, Nery S, Rutlin ML, Radtke F, Fishell G, Gaiano N 2004 Fibroblast growth factor receptor signaling promotes radial glial identity and interacts with Notch1 signaling in telencephalic progenitors. *J Neurosci* 24:9497–9506
  66. Yun K, Fischman S, Johnson J, Hrabe de Angelis M, Weinmaster G, Rubenstein JL 2002 Modulation of the notch signaling by Mash1 and Dlx1/2 regulates sequential specification and differentiation of progenitor cell types in the subcortical telencephalon. *Development* 129:5029–5040
  67. Hitoshi S, Alexson T, Tropepe V, Donoviel D, Elia AJ, Nye JS, Conlon RA, Mak TW, Bernstein A, van der Kooy D 2002 Notch pathway molecules are essential for the maintenance, but not the generation, of mammalian neural stem cells. *Genes Dev* 16:846–858
  68. Ohtsuka T, Ishibashi M, Gradwohl G, Nakanishi S, Guillemot F, Kageyama R 1999 Hes1 and Hes5 as notch effectors in mammalian neuronal differentiation. *EMBO J* 18:2196–2207
  69. Grandbarbe L, Bouissac J, Rand M, Hrabe de Angelis M, Artavanis-Tsakonas S, Mohier E 2003 Delta-Notch signaling controls the generation of neurons/glia from neural stem cells in a stepwise process. *Development* 130:1391–1402
  70. Barrantes IB, Elia AJ, Wunsch K, De Angelis MH, Mak TW, Rossant J, Conlon RA, Gossler A, de la Pompa JL 1999 Interaction between Notch signalling and Lunatic fringe during somite boundary formation in the mouse. *Curr Biol* 9:470–480
  71. Kageyama R, Ohtsuka T 1999 The Notch-Hes pathway in mammalian neural development. *Cell Res* 9:179–188
  72. Nakagawa O, Nakagawa M, Richardson JA, Olson EN, Srivastava D 1999 HRT1, HRT2, and HRT3: a new subclass of bHLH transcription factors marking specific cardiac, somitic, and pharyngeal arch segments. *Dev Biol* 216:72–84
  73. Barsi JC, Rajendra R, Wu JI, Artzt K 2005 Mind bomb1 is a ubiquitin ligase essential for mouse embryonic development and Notch signaling. *Mech Dev* 122:1106–1117
  74. Furukawa T, Mukherjee S, Bao ZZ, Morrow EM, Cepko CL 2000 Rax, Hes1, and Notch1 promote the formation of Muller glia by postnatal retinal progenitor cells. *Neuron* 26:383–394
  75. Hojo M, Ohtsuka T, Hashimoto N, Gradwohl G, Guillemot F, Kageyama R 2000 Glial cell fate specification modulated by the bHLH gene Hes5 in mouse retina. *Development* 127:2515–2522
  76. Scheer N, Groth A, Hans S, Campos-Ortega JA 2001 An instructive function for Notch in promoting gliogenesis in the zebrafish retina. *Development* 128:1099–1107
  77. Henrique D, Hirsinger E, Adam J, Le Roux I, Pourquie O, Ish-Horowicz D, Lewis J 1997 Maintenance of neuroepithelial progenitor cells by Delta-Notch signalling in the embryonic chick retina. *Cell Biol* 7:661–670
  78. Austin CP, Feldman DE, Ida Jr JA, Cepko CL 1995 Vertebrate retinal ganglion cells are selected from competent progenitors by the action of Notch. *Development* 121:3637–3650
  79. Dorsky RI, Chang WS, Rapaport DH, Harris WA 1997 Regulation of neuronal diversity in the *Xenopus* retina by Delta signalling. *Nature* 385:67–70
  80. Chitnis A, Henrique D, Lewis J, Ish-Horowicz D, Kintner C 1995 Primary neurogenesis in *Xenopus* embryos regulated by a homologue of the *Drosophila* neurogenic gene Delta [see comments]. *Nature* 375:761–766
  81. Skeath JB, Thor S 2003 Genetic control of *Drosophila* nerve cord development. *Curr Opin Neurobiol* 13:8–15
  82. Cabrera CV 1990 Lateral inhibition and cell fate during neurogenesis in *Drosophila*: the interactions between scute, Notch and Delta. *Development* 110:733–742
  83. Lewis J 1998 Notch signalling and the control of cell fate choices in vertebrates. *Semin Cell Dev Biol* 9:583–589
  84. Heitzler P, Bourouis M, Ruel L, Carteret C, Simpson P 1996 Genes of the Enhancer of split and achaete-scute complexes are required for a regulatory loop between Notch and Delta during lateral signalling in *Drosophila*. *Development* 122:161–171
  85. Henrique D, Adam J, Myat A, Chitnis A, Lewis J, Ish-Horowicz D 1995 Expression of a Delta homologue in prospective neurons in the chick. *Nature* 375:787–790



86. Dornseifer P, Takke C, Campos-Ortega JA 1997 Overexpression of a zebrafish homologue of the *Drosophila* neurogenic gene Delta perturbs differentiation of primary neurons and somite development. *Mech Dev* 63:159–171
87. Haddon C, Smithers L, Schneider-Maunoury S, Coche T, Henrique D, Lewis J 1998 Multiple delta genes and lateral inhibition in zebrafish primary neurogenesis. *Development* 125:359–370
88. Appel B, Eisen JS 1998 Regulation of neuronal specification in the zebrafish spinal cord by Delta function. *Development* 125:371–380
89. Eddison M, Le Roux I, Lewis J 2000 Notch signaling in the development of the inner ear: lessons from *Drosophila*. *Proc Natl Acad Sci USA* 97:11692–11699
90. Saura CA, Choi SY, Beglopoulos V, Malkani S, Zhang D, Shankaranarayana Rao BS, Chattarji S, Kelleher 3rd RJ, Kandel ER, Duff K, Kirkwood A, Shen J 2004 Loss of presenilin function causes impairments of memory and synaptic plasticity followed by age-dependent neurodegeneration. *Neuron* 42:23–36
91. Costa RM, Honjo T, Silva AJ 2003 Learning and memory deficits in Notch mutant mice. *Curr Biol* 13:1348–1354
92. Pourquie O 2001 Vertebrate somitogenesis. *Annu Rev Cell Dev Biol* 17:311–350
93. Saga Y, Takeda H 2001 The making of the somite: molecular events in vertebrate segmentation. *Nat Rev Genet* 2:835–845
94. Ordahl CP, Le Douarin NM 1992 Two myogenic lineages within the developing somite. *Development* 114:339–353
95. Stern CD, Keynes RJ 1987 Interactions between somite cells: the formation and maintenance of segment boundaries in the chick embryo. *Development* 99:261–272
96. Nowicki JL, Burke AC 2000 Hox genes and morphological identity: axial versus lateral patterning in the vertebrate mesoderm. *Development* 127:4265–4275
97. Zakany J, Kmita M, Alarcon P, de la Pompa JL, Duboule D 2001 Localized and transient transcription of Hox genes suggests a link between patterning and the segmentation clock. *Cell* 106:207–217
98. Oka C, Nakano T, Wakeham A, de la Pompa JL, Mori C, Sakai T, Okazaki S, Kawaichi M, Shiota K, Mak TW, Honjo T 1995 Disruption of the mouse RBP-J  $\kappa$  gene results in early embryonic death. *Development* 121:3291–3301
99. Hrabe de Angelis M, McIntyre JN, Gossler A 1997 Maintenance of somite borders in mice requires the Delta homologue DIII1. *Nature* 386:717–721
100. Jen WC, Wettstein D, Turner D, Chitnis A, Kintner C 1997 The Notch ligand, X-Delta-2, mediates segmentation of the paraxial mesoderm in *Xenopus* embryos. *Development* 124:1169–1178
101. Jen WC, Gawantka V, Pollet N, Niehrs C, Kintner C 1999 Periodic repression of Notch pathway genes governs the segmentation of *Xenopus* embryos. *Genes Dev* 13:1486–1499
102. Palmeirim I, Henrique D, Ish-Horowicz D, Pourquie O 1997 Avian hairy gene expression identifies a molecular clock linked to vertebrate segmentation and somitogenesis. *Cell* 91:639–648
103. Jarriault S, Le Bail O, Hirsinger E, Pourquie O, Logeat F, Strong CF, Brou C, Seidah NG, Israel A 1998 Delta-1 activation of notch-1 signaling results in HES-1 transactivation. *Mol Cell Biol* 18:7423–7431
104. Bray S, Furriols M 2001 Notch pathway: making sense of suppressor of hairless. *Curr Biol* 11:R217–21
105. Bessho Y, Sakata R, Komatsu S, Shiota K, Yamada S, Kageyama R 2001 Dynamic expression and essential functions of Hes7 in somite segmentation. *Genes Dev* 15:2642–2647
106. Henry CA, Urban MK, Dill KK, Merlie JP, Page MF, Kimmel CB, Amacher SL 2002 Two linked hairy/Enhancer of split-related zebrafish genes, *her1* and *her7*, function together to refine alternating somite boundaries. *Development* 129:3693–3704
107. Takke C, Campos-Ortega JA 1999 *her1*, a zebrafish pair-rule like gene, acts downstream of notch signalling to control somite development. *Development* 126:3005–3014
108. Giudicelli F, Lewis J 2004 The vertebrate segmentation clock. *Curr Opin Genet Dev* 14:407–414
109. Hirata H, Yoshiura S, Ohtsuka T, Bessho Y, Harada T, Yoshikawa K, Kageyama R 2002 Oscillatory expression of the bHLH factor Hes1 regulated by a negative feedback loop. *Science* 298:840–843
110. Dale JK, Maroto M, Dequeant ML, Malapert P, McGrew M, Pourquie O 2003 Periodic notch inhibition by lunatic fringe underlies the chick segmentation clock. *Nature* 421:275–278
111. Morales AV, Yasuda Y, Ish-Horowicz D 2002 Periodic lunatic fringe expression is controlled during segmentation by a cyclic transcriptional enhancer responsive to notch signaling. *Dev Cell* 3:63–74
112. Cole SE, Levorse JM, Tilghman SM, Vogt TF 2002 Clock regulatory elements control cyclic expression of lunatic fringe during somitogenesis. *Dev Cell* 3:75–84
113. Morimoto M, Takahashi Y, Endo M, Saga Y 2005 The Mesp2 transcription factor establishes segmental borders by suppressing Notch activity. *Nature* 435:354–359
114. Aulehla A, Wehrle C, Brand-Saberi B, Kemler R, Gossler A, Kanzler B, Herrmann BG 2003 Wnt3a plays a major role in the segmentation clock controlling somitogenesis. *Dev Cell* 4:395–406
115. Weinmaster G, Kintner C 2003 Modulation of notch signaling during somitogenesis. *Annu Rev Cell Dev Biol* 19:367–395
116. Aulehla A, Herrmann BG 2004 Segmentation in vertebrates: clock and gradient finally joined. *Genes Dev* 18:2060–2067
117. Manasek FJ 1968 Embryonic development of the heart. I. A light and electron microscopic study of myocardial development in the early chick embryo. *J Morphol* 125:329–365
118. Ben-Shachar G, Arcilla RA, Lucas RV, Manasek FJ 1985 Ventricular trabeculations in the chick embryo heart and their contribution to ventricular and muscular septal development. *Circ Res* 57:759–766
119. Runyan RB, Markwald RR 1983 Invasion of mesenchyme into three-dimensional collagen gels: a regional and temporal analysis of interaction in embryonic heart tissue. *Dev Biol* 95:108–114
120. Drake CJ, Fleming PA 2000 Vasculogenesis in the day 6.5 to 9.5 mouse embryo. *Blood* 95:1671–1679
121. Reaume AG, Conlon RA, Zirngibl R, Yamaguchi TP, Rossant J 1992 Expression analysis of a Notch homologue in the mouse embryo. *Dev Biol* 154:377–387
122. Villa N, Walker L, Lindsell CE, Gasson J, Iruela-Arispe ML, Weinmaster G 2001 Vascular expression of Notch pathway receptors and ligands is restricted to arterial vessels. *Mech Dev* 108:161–164
123. Lawson ND, Vogel AM, Weinstein BM 2002 Sonic hedgehog and vascular endothelial growth factor act upstream of the Notch pathway during arterial endothelial differentiation. *Dev Cell* 3:127–136
124. Joutel A, Corpechot C, Ducros A, Vahedi K, Chabrierat H, Mouton P, Alamowitch S, Domenga V, Cecillion M, Marechal E, Maciazek J, Vayssiere C, Cruaud C, Cabanis EA, Ruchoux MM, Weissenbach J, Bach JF, Bousser MG, Tournier-Lasserre E 1996 Notch3 mutations in CADASIL, a hereditary adult-onset condition causing stroke and dementia. *Nature* 383:707–710
125. Li L, Krantz ID, Deng Y, Genin A, Banta AB, Collins CC, Qi M, Trask BJ, Kuo WL, Cochran J, Costa T, Pierpont ME, Rand EB, Piccoli DA, Hood L, Spinner NB 1997 Alagille syndrome is caused by mutations in human Jagged1, which encodes a ligand for Notch1. *Nat Genet* 16:243–251
126. Oda T, Elkahoul AG, Pike BL, Okajima K, Krantz ID, Genin A, Piccoli DA, Meltzer PS, Spinner NB, Collins FS, Chandrasekharappa SC, Washburn T, Schweighoffer E, Gridley T, Chang D, Fowlkes BJ, Cado D, Robey E 1997 Mutations in the human Jagged1 gene are responsible for Alagille syndrome. *Nat Genet* 16:235–242
127. Xue Y, Gao X, Lindsell CE, Norton CR, Chang B, Hicks C, Gendron-Maguire M, Rand EB, Weinmaster G, Gridley T 1999 Embryonic lethality and vascular defects in mice lacking the Notch ligand Jagged1. *Hum Mol Genet* 8:723–730
128. Krebs LT, Shutter JR, Tanigaki K, Honjo T, Stark KL, Gridley T 2004 Haploinsufficient lethality and formation of arteriovenous malformations in Notch pathway mutants. *Genes Dev* 18:2469–2473
129. Duarte A, Hirashima M, Benedito R, Trindade A, Diniz P, Bekman E, Costa L, Henrique D, Rossant J 2004 Dosage-sensitive requirement for mouse Dll4 in artery development. *Genes Dev* 18:2474–2478
130. Wang HU, Chen ZF, Anderson DJ 1998 Molecular distinction and angiogenic interaction between embryonic arteries and veins re-

- vealed by ephrin-B2 and its receptor Eph-B4 [see comments]. *Cell* 93:741–753
131. **Zhong TP, Childs S, Leu JP, Fishman MC** 2001 Gridlock signalling pathway fashions the first embryonic artery. *Nature* 414:216–220
  132. **Lawson ND, Scheer N, Pham VN, Kim CH, Chitnis AB, Campos-Ortega JA, Weinstein BM** 2001 Notch signaling is required for arterial-venous differentiation during embryonic vascular development. *Development* 128:3675–3683
  133. **Uyttendaele H, Ho J, Rossant J, Kitajewski J** 2001 Vascular patterning defects associated with expression of activated Notch4 in embryonic endothelium. *Proc Natl Acad Sci USA* 98:5643–5648
  134. **You LR, Lin FJ, Lee CT, DeMayo FJ, Tsai MJ, Tsai SY** 2005 Suppression of Notch signalling by the COUP-TFII transcription factor regulates vein identity. *Nature* 435:98–104
  135. **Hirashima M, Suda T** 2006 Differentiation of arterial and venous endothelial cells and vascular morphogenesis. *Endothelium* 13: 137–145
  136. **Loomes KM, Underkoffler LA, Morabito J, Gottlieb S, Piccoli DA, Spinner NB, Baldwin HS, Oakey RJ** 1999 The expression of Jagged1 in the developing mammalian heart correlates with cardiovascular disease in Alagille syndrome. *Hum Mol Genet* 8:2443–2449
  137. **McCright B, Lozier J, Gridley T** 2002 A mouse model of Alagille syndrome: Notch2 as a genetic modifier of Jag1 haploinsufficiency. *Development* 129:1075–1082
  138. **Rones MS, McLaughlin KA, Raffin M, Mercola M** 2000 Serrate and Notch specify cell fates in the heart field by suppressing cardiomyogenesis. *Development* 127:3865–3876
  139. **Nemir M, Croquelois A, Pedrazzini T, Radtke F** 2006 Induction of cardiogenesis in embryonic stem cells via downregulation of Notch1 signaling. *Circ Res* 98:1471–1478
  140. **Timmerman LA, Grego-Bessa J, Raya A, Bertran E, Perez-Pomares JM, Diez J, Aranda S, Palomo S, McCormick F, Izpisua-Belmonte JC, de la Pompa JL** 2004 Notch promotes epithelial-mesenchymal transition during cardiac development and oncogenic transformation. *Genes Dev* 18:99–115
  141. **Lincoln J, Alfieri CM, Yutzev KE** 2004 Development of heart valve leaflets and supporting apparatus in chicken and mouse embryos. *Dev Dyn* 230:239–250
  142. **Barrallo-Gimeno A, Nieto MA** 2005 The Snail genes as inducers of cell movement and survival: implications in development and cancer. *Development* 132:3151–3161
  143. **Beis D, Bartman T, Jin SW, Scott IC, D'Amico LA, Ober EA, Verkade H, Frantsve J, Field HA, Wehman A, Baier H, Tallafuss A, Bally-Cuif L, Chen JN, Stainier DY, Jungblut B** 2005 Genetic and cellular analyses of zebrafish atrioventricular cushion and valve development. *Development* 132:4193–4204
  144. **Watanabe Y, Kokubo H, Miyagawa-Tomita S, Endo M, Igarashi K, Aisaki KI, Kanno J, Saga Y** 2006 Activation of Notch1 signaling in cardiogenic mesoderm induces abnormal heart morphogenesis in mouse. *Development* 133:1625–1634
  145. **Garg V, Muth AN, Ransom JF, Schluterman MK, Barnes R, King IN, Grossfeld PD, Srivastava D** 2005 Mutations in NOTCH1 cause aortic valve disease. *Nature* 437:270–274
  146. **Kokubo H, Miyagawa-Tomita S, Tomimatsu H, Nakashima Y, Nakazawa M, Saga Y, Johnson RL** 2004 Targeted disruption of *hes2* results in atrioventricular valve anomalies that lead to heart dysfunction. *Circ Res* 95:540–547
  147. **Fischer A, Schumacher N, Maier M, Sendtner M, Gessler M** 2004 The Notch target genes *Hey1* and *Hey2* are required for embryonic vascular development. *Genes Dev* 18:901–911
  148. **Kokubo H, Miyagawa-Tomita S, Nakazawa M, Saga Y, Johnson RL** 2005 Mouse *hes1* and *hes2* genes are redundantly required to mediate Notch signaling in the developing cardiovascular system. *Dev Biol* 278:301–309
  149. **Kokubo H, Miyagawa-Tomita S, Johnson RL** 2005 *Hesr*, a mediator of the Notch signaling, functions in heart and vessel development. *Trends Cardiovasc Med* 15:190–194
  150. **Daudet N, Lewis J** 2005 Two contrasting roles for Notch activity in chick inner ear development: specification of prosensory patches and lateral inhibition of hair-cell differentiation. *Development* 132: 541–551
  151. **Irvine KD, Vogt TF** 1997 Dorsal-ventral signaling in limb development. *Curr Opin Cell Biol* 9:867–876
  152. **Artavanis-Tsakonas S, Rand MD, Lake RJ** 1999 Notch signaling: cell fate control and signal integration in development. *Science* 284:770–776
  153. **Slack JM** 1995 Developmental biology of the pancreas. *Development* 121:1569–1580
  154. **Edlund H** 2001 Developmental biology of the pancreas. *Diabetes* 50(Suppl 1):S5–S9
  155. **Jonsson J, Carlsson L, Edlund T, Edlund H** 1994 Insulin-promoter-factor 1 is required for pancreas development in mice. *Nature* 371:606–609
  156. **Herrera PL** 2000 Adult insulin- and glucagon-producing cells differentiate from two independent cell lineages. *Development* 127: 2317–2322
  157. **Wessells NK, Evans J** 1968 Ultrastructural studies of early morphogenesis and cytodifferentiation in the embryonic mammalian pancreas. *Dev Biol* 17:413–446
  158. **Murtaugh LC, Melton DA** 2003 Genes, signals, and lineages in pancreas development. *Annu Rev Cell Dev Biol* 19:71–89
  159. **Jensen J** 2004 Gene regulatory factors in pancreatic development. *Dev Dyn* 229:176–200
  160. **Chiang MK, Melton DA** 2003 Single-cell transcript analysis of pancreas development. *Dev Cell* 4:383–393
  161. **Apelqvist A, Li H, Sommer L, Beatus P, Anderson DJ, Honjo T, Hrabe de Angelis M, Lendahl U, Edlund H** 1999 Notch signalling controls pancreatic cell differentiation. *Nature* 400:877–881
  162. **Jensen J, Pedersen EE, Galante P, Hald J, Heller RS, Ishibashi M, Kageyama R, Guillemot F, Serup P, Madsen OD** 2000 Control of endodermal endocrine development by *Hes-1*. *Nat Genet* 24:36–44
  163. **Lammert E, Brown J, Melton DA** 2000 Notch gene expression during pancreatic organogenesis. *Mech Dev* 94:199–203
  164. **Gradwohl G, Dierich A, LeMeur M, Guillemot F** 2000 Neurogenin3 is required for the development of the four endocrine cell lineages of the pancreas. *Proc Natl Acad Sci USA* 97:1607–1611
  165. **Lee JC, Smith SB, Watada H, Lin J, Scheel D, Wang J, Mirmira RG, German MS** 2001 Regulation of the pancreatic pro-endocrine gene *neurogenin3*. *Diabetes* 50:928–936
  166. **Murtaugh LC, Stanger BZ, Kwan KM, Melton DA** 2003 Notch signaling controls multiple steps of pancreatic differentiation. *Proc Natl Acad Sci USA* 100:14920–14925
  167. **Hald J, Hjorth JP, German MS, Madsen OD, Serup P, Jensen J** 2003 Activated Notch1 prevents differentiation of pancreatic acinar cells and attenuate endocrine development. *Dev Biol* 260:426–437
  168. **Miyamoto Y, Maitra A, Ghosh B, Zechner U, Argani P, Iacobuzio-Donahue CA, Sriuranpong V, Iso T, Meszoely IM, Wolfe MS, Hruban RH, Ball DW, Schmid RM, Leach SD** 2003 Notch mediates TGF  $\alpha$ -induced changes in epithelial differentiation during pancreatic tumorigenesis. *Cancer Cell* 3:565–576
  169. **Esni F, Ghosh B, Biankin AV, Lin JW, Albert MA, Yu X, MacDonald RJ, Civin CI, Real FX, Pack MA, Ball DW, Leach SD** 2004 Notch inhibits Ptf1 function and acinar cell differentiation in developing mouse and zebrafish pancreas. *Development* 131:4213–4224
  170. **Field HA, Dong PD, Beis D, Stainier DY** 2003 Formation of the digestive system in zebrafish. II. Pancreas morphogenesis. *Dev Biol* 261:197–208
  171. **Bhushan A, Itoh N, Kato S, Thiery JP, Czernichow P, Bellusci S, Scharfmann R** 2001 Fgf10 is essential for maintaining the proliferative capacity of epithelial progenitor cells during early pancreatic organogenesis. *Development* 128:5109–5117
  172. **Norgaard GA, Jensen JN, Jensen J** 2003 FGF10 signaling maintains the pancreatic progenitor cell state revealing a novel role of Notch in organ development. *Dev Biol* 264:323–338
  173. **Hart A, Papadopoulos S, Edlund H** 2003 Fgf10 maintains notch activation, stimulates proliferation, and blocks differentiation of pancreatic epithelial cells. *Dev Dyn* 228:185–193
  174. **Fukuda A, Kawaguchi Y, Furuyama K, Kodama S, Horiguchi M, Kuhara T, Koizumi M, Boyer DF, Fujimoto K, Doi R, Kageyama R, Wright CV, Chiba T** 2006 Ectopic pancreas formation in *Hes1*-knockout mice reveals plasticity of endodermal progenitors of the gut, bile duct, and pancreas. *J Clin Invest* 116:1484–1493



175. Radtke F, Clevers H 2005 Self-renewal and cancer of the gut: two sides of a coin. *Science* 307:1904–1909
176. Aster JC 2005 Deregulated NOTCH signaling in acute T-cell lymphoblastic leukemia/lymphoma: new insights, questions, and opportunities. *Int J Hematol* 82:295–301
177. Marshman E, Booth C, Potten CS 2002 The intestinal epithelial stem cell. *Bioessays* 24:91–98
178. Hocker M, Wiedenmann B 1998 Molecular mechanisms of enteroendocrine differentiation. *Ann NY Acad Sci* 859:160–174
179. Sancho E, Battle E, Clevers H 2004 Signaling pathways in intestinal development and cancer. *Annu Rev Cell Dev Biol* 20:695–723
180. Crosnier C, Vargesson N, Gschmeissner S, Ariza-McNaughton L, Morrison A, Lewis J 2005 Delta-Notch signalling controls commitment to a secretory fate in the zebrafish intestine. *Development* 132:1093–1104
181. Schroder N, Gossler A 2002 Expression of Notch pathway components in fetal and adult mouse small intestine. *Gene Expr Patterns* 2:247–250
182. Yang Q, Bermingham NA, Finegold MJ, Zoghbi HY 2001 Requirement of Math1 for secretory cell lineage commitment in the mouse intestine. *Science* 294:2155–2158
183. van Es JH, van Gijn ME, Riccio O, van den Born M, Vooijs M, Begthel H, Cozijnsen M, Robine S, Winton DJ, Radtke F, Clevers H 2005 Notch/ $\gamma$ -secretase inhibition turns proliferative cells in intestinal crypts and adenomas into goblet cells. *Nature* 435:959–963
184. Fre S, Huyghe M, Mourikis P, Robine S, Louvard D, Artavanis-Tsakonas S 2005 Notch signals control the fate of immature progenitor cells in the intestine. *Nature* 435:964–968
185. Zine A, de Ribaupierre F 2002 Notch/Notch ligands and Math1 expression patterns in the organ of Corti of wild-type and Hes1 and Hes5 mutant mice. *Hear Res* 170:22–31
186. Yamada T, Yamazaki H, Yamane T, Yoshino M, Okuyama H, Tsuneto M, Kurino T, Hayashi S, Sakano S 2003 Regulation of osteoclast development by Notch signaling directed to osteoclast precursors and through stromal cells. *Blood* 101:2227–2234
187. Sciaudone M, Gazzerri E, Priest L, Delany AM, Canalis E 2003 Notch 1 impairs osteoblastic cell differentiation. *Endocrinology* 144:5631–5639
188. Tezuka K, Yasuda M, Watanabe N, Morimura N, Kuroda K, Miyatani S, Hozumi N 2002 Stimulation of osteoblastic cell differentiation by Notch. *J Bone Miner Res* 17:231–239
189. Watanabe N, Tezuka Y, Matsuno K, Miyatani S, Morimura N, Yasuda M, Fujimaki R, Kuroda K, Hiraki Y, Hozumi N, Tezuka K 2003 Suppression of differentiation and proliferation of early chondrogenic cells by Notch. *J Bone Miner Metab* 21:344–352
190. Nobta M, Tsukazaki T, Shibata Y, Xin C, Moriishi T, Sakano S, Shindo H, Yamaguchi A 2005 Critical regulation of bone morphogenetic protein-induced osteoblastic differentiation by Delta1/Jagged1-activated Notch1 signaling. *J Biol Chem* 280:15842–15848
191. Gong JK 1978 Endosteal marrow: a rich source of hematopoietic stem cells. *Science* 199:1443–1445
192. Cui YF, Lord BI, Woolford LB, Testa NG 1996 The relative spatial distribution of in vitro-CFCs in the bone marrow, responding to specific growth factors. *Cell Prolif* 29:243–257
193. Taichman RS, Reilly MJ, Emerson SG 1996 Human osteoblasts support human hematopoietic progenitor cells in vitro bone marrow cultures. *Blood* 87:518–524
194. Calvi LM, Adams GB, Weibrecht KW, Weber JM, Olson DP, Knight MC, Martin RP, Schipani E, Divieti P, Bringhurst FR, Milner LA, Kronenberg HM, Scadden DT 2003 Osteoblastic cells regulate the haematopoietic stem cell niche. *Nature* 425:841–846
195. Stier S, Cheng T, Dombkowski D, Carlesso N, Scadden DT 2002 Notch1 activation increases hematopoietic stem cell self-renewal in vivo and favors lymphoid over myeloid lineage outcome. *Blood* 99:2369–2378
196. Karanu FN, Murdoch B, Gallacher L, Wu DM, Koremoto M, Sakano S, Bhatia M 2000 The notch ligand jagged-1 represents a novel growth factor of human hematopoietic stem cells. *J Exp Med* 192:1365–1372
197. Pereira RM, Delany AM, Durant D, Canalis E 2002 Cortisol regulates the expression of Notch in osteoblasts. *J Cell Biochem* 85:252–258
198. Weber JM, Forsythe SR, Christianson CA, Frisch BJ, Gigliotti BJ, Jordan CT, Milner LA, Guzman ML, Calvi LM 2006 Parathyroid hormone stimulates expression of the Notch ligand Jagged1 in osteoblastic cells. *Bone* 39:485–493
199. Gregorieff A, Clevers H 2005 Wnt signaling in the intestinal epithelium: from endoderm to cancer. *Genes Dev* 19:877–890
200. Wilson A, Radtke F 2006 Multiple functions of Notch signaling in self-renewing organs and cancer. *FEBS Lett* 580:2860–2868
201. Maillard I, Pear WS 2003 Notch and cancer: best to avoid the ups and downs. *Cancer Cell* 3:203–205
202. Radtke F, Raj K 2003 The role of Notch in tumorigenesis: oncogene or tumour suppressor? *Nat Rev Cancer* 3:756–767
203. Capobianco AJ, Zagouras P, Blaumueller CM, Artavanis-Tsakonas S, Bishop JM 1997 Neoplastic transformation by truncated alleles of human NOTCH1/TAN1 and NOTCH2. *Mol Cell Biol* 17:6265–6273
204. Pear WS, Aster JC, Scott ML, Hasserjian RP, Soffer B, Sklar J, Baltimore D 1996 Exclusive development of T cell neoplasms in mice transplanted with bone marrow expressing activated Notch alleles. *J Exp Med* 183:2283–2291
205. Bellavia D, Campese AF, Alesse E, Vacca A, Felli MP, Balestri A, Stoppacciaro A, Tiveron C, Tatangelo L, Giovarelli M, Gaetano C, Rucio L, Hoffman ES, Hayday AC, Lendahl U, Frati L, Gulino A, Screpanti I 2000 Constitutive activation of NF- $\kappa$ B and T-cell leukemia/lymphoma in Notch3 transgenic mice. *EMBO J* 19:3337–3348
206. Callahan R, Raafat A 2001 Notch signaling in mammary gland tumorigenesis. *J Mammary Gland Biol Neoplasia* 6:23–36
207. Kiaris H, Politi K, Grimm LM, Szabolcs M, Fisher P, Efstratiadis A, Artavanis-Tsakonas S 2004 Modulation of notch signaling elicits signature tumors and inhibits hras1-induced oncogenesis in the mouse mammary epithelium. *Am J Pathol* 165:695–705
208. Hu C, Dievart A, Lupien M, Calvo E, Tremblay G, Jolicœur P 2006 Overexpression of activated murine Notch1 and Notch3 in transgenic mice blocks mammary gland development and induces mammary tumors. *Am J Pathol* 168:973–990
209. Nickoloff BJ, Osborne BA, Miele L 2003 Notch signaling as a therapeutic target in cancer: a new approach to the development of cell fate modifying agents. *Oncogene* 22:6598–6608
210. Leong KG, Karsan A 2006 Recent insights into the role of Notch signaling in tumorigenesis. *Blood* 107:2223–2233
211. van Es JH, Clevers H 2005 Notch and Wnt inhibitors as potential new drugs for intestinal neoplastic disease. *Trends Mol Med* 11:496–502
212. Stylianou S, Clarke RB, Brennan K 2006 Aberrant activation of notch signaling in human breast cancer. *Cancer Res* 66:1517–1525
213. Wang Z, Zhang Y, Li Y, Banerjee S, Liao J, Sarkar FH 2006 Down-regulation of Notch-1 contributes to cell growth inhibition and apoptosis in pancreatic cancer cells. *Mol Cancer Ther* 5:483–493
214. Wang Z, Zhang Y, Banerjee S, Li Y, Sarkar FH 2006 Notch-1 down-regulation by curcumin is associated with the inhibition of cell growth and the induction of apoptosis in pancreatic cancer cells. *Cancer* 106:2503–2513
215. Girard L, Hanna Z, Beaulieu N, Hoemann CD, Simard C, Kozak CA, Jolicœur P 1996 Frequent provirus insertional mutagenesis of Notch1 in thymomas of MMTVD/myc transgenic mice suggests a collaboration of c-myc and Notch1 for oncogenesis. *Genes Dev* 10:1930–1944
216. Beverly LJ, Capobianco AJ 2003 Perturbation of Ikaros isoform selection by MLV integration is a cooperative event in Notch(IC)-induced T cell leukemogenesis. *Cancer Cell* 3:551–564
217. Lefort K, Dotto GP 2004 Notch signaling in the integrated control of keratinocyte growth/differentiation and tumor suppression. *Semin Cancer Biol* 14:374–386
218. Zeng Q, Li S, Chepeha DB, Giordano TJ, Li J, Zhang H, Polverini PJ, Nor J, Kitajewski J, Wang CY 2005 Crosstalk between tumor and endothelial cells promotes tumor angiogenesis by MAPK activation of Notch signaling. *Cancer Cell* 8:13–23
219. Noguera-Troise I, Daly C, Papadopoulos NJ, Coetzee S, Bolland P, Gale NW, Lin HC, Yancopoulos GD, Thurston G 2006 Blockade of Dll4 inhibits tumour growth by promoting non-productive angiogenesis. *Nature* 444:1032–1037
220. Robert-Moreno A, Espinosa L, de la Pompa JL, Bigas A 2005



- RBP $\kappa$ -dependent Notch function regulates Gata2 and is essential for the formation of intra-embryonic hematopoietic cells. *Development* 132:1117–1126
221. Milner LA, Bigas A 1999 Notch as a mediator of cell fate determination in hematopoiesis: evidence and speculation. *Blood* 93:2431–2448
  222. Duncan AW, Rattis FM, DiMascio LN, Congdon KL, Pazianos G, Zhao C, Yoon K, Cook JM, Willert K, Gaiano N, Reya T 2005 Integration of Notch and Wnt signaling in hematopoietic stem cell maintenance. *Nat Immunol* 6:314–322
  223. Ellisen LW, Bird J, West DC, Soreng AL, Reynolds TC, Smith SD, Sklar J 1991 TAN-1, the human homolog of the *Drosophila* notch gene, is broken by chromosomal translocations in T lymphoblastic neoplasms. *Cell* 66:649–661
  224. Weng AP, Ferrando AA, Lee W, Morris JPt, Silverman LB, Sanchez-Irizarry C, Blacklow SC, Look AT, Aster JC 2004 Activating mutations of NOTCH1 in human T cell acute lymphoblastic leukemia. *Science* 306:269–271
  225. Weng AP, Millholland JM, Yashiro-Ohtani Y, Arcangeli ML, Lau A, Wai C, Del Bianco C, Rodriguez CG, Sai H, Tobias J, Li Y, Wolfe MS, Shachaf C, Felsner D, Blacklow SC, Pear WS, Aster JC 2006 c-Myc is an important direct target of Notch1 in T-cell acute lymphoblastic leukemia/lymphoma. *Genes Dev* 20:2096–2109
  226. Morimura T, Goitsuka R, Zhang Y, Saito I, Reth M, Kitamura D 2000 Cell cycle arrest and apoptosis induced by Notch1 in B cells. *J Biol Chem* 275:36523–36531
  227. Romer S, Saunders U, Jack HM, Jehn BM 2003 Notch1 enhances B-cell receptor-induced apoptosis in mature activated B cells without affecting cell cycle progression and surface IgM expression. *Cell Death Differ* 10:833–844
  228. Nefedova Y, Cheng P, Alsina M, Dalton WS, Gabrilovich DI 2004 Involvement of Notch-1 signaling in bone marrow stroma-mediated de novo drug resistance of myeloma and other malignant lymphoid cell lines. *Blood* 103:3503–3510
  229. Hubmann R, Schwarzmeier JD, Shehata M, Hilgarth M, Duechler M, Dettke M, Berger R 2002 Notch2 is involved in the overexpression of CD23 in B-cell chronic lymphocytic leukemia. *Blood* 99:3742–3747
  230. Jundt F, Anagnostopoulos I, Forster R, Mathas S, Stein H, Dorken B 2002 Activated Notch1 signaling promotes tumor cell proliferation and survival in Hodgkin and anaplastic large cell lymphoma. *Blood* 99:3398–3403
  231. Jundt F, Probsting KS, Anagnostopoulos I, Muehlinghaus G, Chatterjee M, Mathas S, Bargou RC, Manz R, Stein H, Dorken B 2004 Jagged1-induced Notch signaling drives proliferation of multiple myeloma cells. *Blood* 103:3511–3515
  232. Zweidler-McKay PA, He Y, Xu L, Rodriguez CG, Karnell FG, Carpenter AC, Aster JC, Allman D, Pear WS 2005 Notch signaling is a potent inducer of growth arrest and apoptosis in a wide range of B-cell malignancies. *Blood* 106:3898–3906
  233. Woodward WA, Chen MS, Behbod F, Rosen JM 2005 On mammary stem cells. *J Cell Sci* 118:3585–3594
  234. Dontu G, Al-Hajj M, Abdallah WM, Clarke MF, Wicha MS 2003 Stem cells in normal breast development and breast cancer. *Cell Prolif* 36(Suppl 1):59–72
  235. Dontu G, Jackson KW, McNicholas E, Kawamura MJ, Abdallah WM, Wicha MS 2004 Role of Notch signaling in cell-fate determination of human mammary stem/progenitor cells. *Breast Cancer Res* 6:R605–R615
  236. Liu S, Dontu G, Wicha MS 2005 Mammary stem cells, self-renewal pathways, and carcinogenesis. *Breast Cancer Res* 7:86–95
  237. Smith GH, Gallahan D, Diella F, Jhappan C, Merlino G, Callahan R 1995 Constitutive expression of a truncated INT3 gene in mouse mammary epithelium impairs differentiation and functional development. *Cell Growth Differ* 6:563–577
  238. Nusse R 1988 The activation of cellular oncogenes by proviral insertion in murine mammary cancer. *Cancer Treat Res* 40:283–306
  239. Gallahan D, Callahan R 1997 The mouse mammary tumor associated gene INT3 is a unique member of the NOTCH gene family (NOTCH4). *Oncogene* 14:1883–1890
  240. Gallahan D, Jhappan C, Robinson G, Hennighausen L, Sharp R, Kordon E, Callahan R, Merlino G, Smith GH 1996 Expression of a truncated Int3 gene in developing secretory mammary epithelium specifically retards lobular differentiation resulting in tumorigenesis. *Cancer Res* 56:1775–1785
  241. Raafat A, Bargo S, Anver MR, Callahan R 2004 Mammary development and tumorigenesis in mice expressing a truncated human Notch4/Int3 intracellular domain (h-Int3sh). *Oncogene* 23:9401–9407
  242. Dievert A, Beaulieu N, Jolicoeur P 1999 Involvement of Notch1 in the development of mouse mammary tumors. *Oncogene* 18:5973–5981
  243. Klinakis A, Szabolcs M, Politi K, Kiaris H, Artavanis-Tsakonas S, Efstratiadis A 2006 Myc is a Notch1 transcriptional target and a requisite for Notch1-induced mammary tumorigenesis in mice. *Proc Natl Acad Sci USA* 103:9262–9267
  244. Pece S, Serresi M, Santolini E, Capra M, Hulleman E, Galimberti V, Zurrida S, Maisonneuve P, Viale G, Di Fiore PP 2004 Loss of negative regulation by Numb over Notch is relevant to human breast carcinogenesis. *J Cell Biol* 167:215–221
  245. Weizsen S, Rizzo P, Braid M, Vaishnav R, Jonkheer SM, Zlobin A, Osborne BA, Gottipati S, Aster JC, Hahn WC, Rudolf M, Siziopikou K, Kast WM, Miele L 2002 Activation of Notch-1 signaling maintains the neoplastic phenotype in human Ras-transformed cells. *Nat Med* 8:979–986
  246. Gohring UJ, Schondorf T, Kiecker VR, Becker M, Kurbacher C, Scharl A 1999 Immunohistochemical detection of H-ras protooncogene p21 indicates favorable prognosis in node-negative breast cancer patients. *Tumour Biol* 20:173–183
  247. Bos JL 1989 Ras oncogenes in human cancer: a review. *Cancer Res* 49:4682–4689
  248. Fitzgerald K, Harrington A, Leder P 2000 Ras pathway signals are required for notch-mediated oncogenesis. *Oncogene* 19:4191–4198
  249. Ronchini C, Capobianco AJ 2001 Induction of cyclin D1 transcription and CDK2 activity by Notch(ic): implication for cell cycle disruption in transformation by Notch(ic). *Mol Cell Biol* 21:5925–5934
  250. Yu Q, Geng Y, Sicinski P 2001 Specific protection against breast cancers by cyclin D1 ablation. *Nature* 411:1017–1021
  251. Ayyanan A, Civenni G, Ciarloni L, Morel C, Mueller N, Lefort K, Mandinova A, Raffoul W, Fiche M, Dotto GP, Briskin C 2006 Increased Wnt signaling triggers oncogenic conversion of human breast epithelial cells by a Notch-dependent mechanism. *Proc Natl Acad Sci USA* 103:3799–3804
  252. Parr C, Watkins G, Jiang WG 2004 The possible correlation of Notch-1 and Notch-2 with clinical outcome and tumour clinicopathological parameters in human breast cancer. *Int J Mol Med* 14:779–786
  253. Reedijk M, Odorcic S, Chang L, Zhang H, Miller N, McCreedy DR, Lockwood G, Egan SE 2005 High-level coexpression of JAG1 and NOTCH1 is observed in human breast cancer and is associated with poor overall survival. *Cancer Res* 65:8530–8537
  254. Mungamuri SK, Yang X, Thor AD, Somasundaram K 2006 Survival signaling by Notch1: mammalian target of rapamycin (mTOR)-dependent inhibition of p53. *Cancer Res* 66:4715–4724
  255. Lowell S, Jones P, Le Roux I, Dunne J, Watt FM 2000 Stimulation of human epidermal differentiation by delta-notch signalling at the boundaries of stem-cell clusters. *Curr Biol* 10:491–500
  256. Rangarajan A, Talora C, Okuyama R, Nicolas M, Mammucari C, Oh H, Aster JC, Krishna S, Metzger D, Chambon P, Miele L, Aguet M, Radtke F, Dotto GP 2001 Notch signaling is a direct determinant of keratinocyte growth arrest and entry into differentiation. *EMBO J* 20:3427–3436
  257. Nicolas M, Wolfer A, Raj K, Kummer JA, Mill P, van Noort M, Hui CC, Clevers H, Dotto GP, Radtke F 2003 Notch1 functions as a tumor suppressor in mouse skin. *Nat Genet* 33:416–421
  258. Topley GI, Okuyama R, Gonzales JG, Conti C, Dotto GP 1999 p21(WAF1/Cip1) functions as a suppressor of malignant skin tumor formation and a determinant of keratinocyte stem-cell potential. *Proc Natl Acad Sci USA* 96:9089–9094
  259. Proweller A, Tu L, Lepore JJ, Cheng L, Lu MM, Seykora J, Millar SE, Pear WS, Parmacek MS 2006 Impaired notch signaling promotes de novo squamous cell carcinoma formation. *Cancer Res* 66:7438–7444
  260. Thelu J, Rossio P, Favier B 2002 Notch signalling is linked to

- epidermal cell differentiation level in basal cell carcinoma, psoriasis and wound healing. *BMC Dermatol* 2:7
261. Mammucari C, Tommasi di Vignano A, Sharov AA, Neilson J, Havrda MC, Roop DR, Botchkarev VA, Crabtree GR, Dotto GP 2005 Integration of Notch 1 and calcineurin/NFAT signaling pathways in keratinocyte growth and differentiation control. *Dev Cell* 8:665–676
262. Zhu AJ, Haase I, Watt FM 1999 Signaling via  $\beta$ 1 integrins and mitogen-activated protein kinase determines human epidermal stem cell fate in vitro. *Proc Natl Acad Sci USA* 96:6728–6733
263. Gat U, DasGupta R, Degenstein L, Fuchs E 1998 De Novo hair follicle morphogenesis and hair tumors in mice expressing a truncated  $\beta$ -catenin in skin. *Cell* 95:605–614
264. Herlyn M 2005 Metastatic melanoma cells. Introduction. *Cancer Metastasis Rev* 24:193–194
265. Balint K, Xiao M, Pinnix CC, Soma A, Veres I, Juhasz I, Brown EJ, Capobianco AJ, Herlyn M, Liu ZJ 2005 Activation of Notch1 signaling is required for  $\beta$ -catenin-mediated human primary melanoma progression. *J Clin Invest* 115:3166–3176
266. Liu ZJ, Xiao M, Balint K, Smalley KS, Brafford P, Qiu R, Pinnix CC, Li X, Herlyn M 2006 Notch1 signaling promotes primary melanoma progression by activating mitogen-activated protein kinase/phosphatidylinositol 3-kinase-Akt pathways and up-regulating N-cadherin expression. *Cancer Res* 66:4182–4190
267. Bhat KM, Maddodi N, Shashikant C, Setaluri V 2006 Transcriptional regulation of human MAP2 gene in melanoma: role of neuronal bHLH factors and Notch1 signaling. *Nucleic Acids Res* 34:3819–3832
268. Soltani MH, Pichardo R, Song Z, Sangha N, Camacho F, Satyamoorthy K, Sanguenza OP, Setaluri V 2005 Microtubule-associated protein 2, a marker of neuronal differentiation, induces mitotic defects, inhibits growth of melanoma cells, and predicts metastatic potential of cutaneous melanoma. *Am J Pathol* 166:1841–1850
269. Hoek K, Rimm DL, Williams KR, Zhao H, Ariyan S, Lin A, Kluger HM, Berger AJ, Cheng E, Trombetta ES, Wu T, Niinobe M, Yoshikawa K, Hannigan GE, Halaban R 2004 Expression profiling reveals novel pathways in the transformation of melanocytes to melanomas. *Cancer Res* 64:5270–5282
270. Qin JZ, Stennett L, Bacon P, Bodner B, Hendrix MJ, Seftor RE, Seftor EA, Margaryan NV, Pollock PM, Curtis A, Trent JM, Bennett F, Miele L, Nickoloff BJ 2004 p53-independent NOXA induction overcomes apoptotic resistance of malignant melanomas. *Mol Cancer Ther* 3:895–902
271. Nickoloff BJ, Hendrix MJ, Pollock PM, Trent JM, Miele L, Qin JZ 2005 Notch and NOXA-related pathways in melanoma cells. *J Invest Dermatol Symp Proc* 10:95–104
272. Thiery JP 2002 Epithelial-mesenchymal transitions in tumour progression. *Nat Rev Cancer* 2:442–454
273. Thiery JP, Sleeman JP 2006 Complex networks orchestrate epithelial-mesenchymal transitions. *Nat Rev Mol Cell Biol* 7:131–142
274. Birchmeier W, Behrens J 1994 Cadherin expression in carcinomas: role in the formation of cell junctions and the prevention of invasiveness. *Biochim Biophys Acta* 1198:11–26
275. Hulsken J, Behrens J, Birchmeier W 1994 Tumor-suppressor gene products in cell contacts: the cadherin-APC-armadillo connection. *Curr Opin Cell Biol* 6:711–716
276. Perl AK, Wilgenbus P, Dahl U, Semb H, Christofori G 1998 A causal role for E-cadherin in the transition from adenoma to carcinoma. *Nature* 392:190–193
277. Peinado H, Portillo F, Cano A 2004 Transcriptional regulation of cadherins during development and carcinogenesis. *Int J Dev Biol* 48:365–375
278. Cano A, Perez-Moreno MA, Rodrigo I, Locascio A, Blanco MJ, del Barrio MG, Portillo F, Nieto MA 2000 The transcription factor snail controls epithelial-mesenchymal transitions by repressing E-cadherin expression. *Nat Cell Biol* 2:76–83
279. Batlle E, Sancho E, Franci C, Dominguez D, Monfar M, Baulida J, Garcia De Herreros A 2000 The transcription factor snail is a repressor of E-cadherin gene expression in epithelial tumour cells. *Nat Cell Biol* 2:84–89
280. Nosedá M, McLean G, Niessen K, Chang L, Pollet I, Montpetit R, Shahidi R, Dorovini-Zis K, Li L, Beckstead B, Durand RE, Hoodless PA, Karsan A 2004 Notch activation results in phenotypic and functional changes consistent with endothelial-to-mesenchymal transformation. *Circ Res* 94:910–917
281. Masuda S, Kumano K, Shimizu K, Imai Y, Kurokawa M, Ogawa S, Miyagishi M, Taira K, Hirai H, Chiba S 2005 Notch1 oncoprotein antagonizes TGF- $\beta$ /Smad-mediated cell growth suppression via sequestration of coactivator p300. *Cancer Sci* 96:274–282
282. Sun Y, Lowther W, Kato K, Bianco C, Kenney N, Strizzi L, Raafat D, Hirota M, Khan NI, Bargo S, Jones B, Salomon D, Callahan R 2005 Notch4 intracellular domain binding to Smad3 and inhibition of the TGF- $\beta$  signaling. *Oncogene* 24:5365–5374
283. Zavadil J, Cermak L, Soto-Nieves N, Bottlinger EP 2004 Integration of TGF- $\beta$ /Smad and Jagged1/Notch signalling in epithelial-to-mesenchymal transition. *EMBO J* 23:1155–1165
284. Santagata S, Demicheli F, Riva A, Varambally S, Hofer MD, Kutok JL, Kim R, Tang J, Montie JE, Chinnaiyan AM, Rubin MA, Aster JC 2004 JAGGED1 expression is associated with prostate cancer metastasis and recurrence. *Cancer Res* 64:6854–6857
285. Ramaswamy S, Ross KN, Lander ES, Golub TR 2003 A molecular signature of metastasis in primary solid tumors. *Nat Genet* 33:49–54
286. Wolfe MS 2006 The  $\gamma$ -secretase complex: membrane-embedded proteolytic ensemble. *Biochemistry* 45:7931–7939
287. Yoon K, Gaiano N 2005 Notch signaling in the mammalian central nervous system: insights from mouse mutants. *Nat Neurosci* 8:709–715
288. Adams RH 2003 Molecular control of arterial-venous blood vessel identity. *J Anat* 202:105–112
289. Lee SY, Kumano K, Masuda S, Hangaishi A, Takita J, Nakazaki K, Kurokawa M, Hayashi Y, Ogawa S, Chiba S 2005 Mutations of the Notch1 gene in T-cell acute lymphoblastic leukemia: analysis in adults and children. *Leukemia* 19:1841–1843
290. O'Neil J, Calvo J, McKenna K, Krishnamoorthy V, Aster JC, Bassing CH, Alt FW, Kelliher M, Look AT 2006 Activating Notch1 mutations in mouse models of T-ALL. *Blood* 107:781–785
291. Rohn JL, Lauring AS, Linenberger ML, Overbaugh J 1996 Transduction of Notch2 in feline leukemia virus-induced thymic lymphoma. *J Virol* 70:8071–8080
292. Yan XQ, Sarmiento U, Sun Y, Huang G, Guo J, Juan T, Van G, Qi MY, Scully S, Senaldi G, Fletcher FA 2001 A novel Notch ligand, Dll4, induces T-cell leukemia/lymphoma when overexpressed in mice by retroviral-mediated gene transfer. *Blood* 98:3793–3799
293. Talora C, Sgroi DC, Crum CP, Dotto GP 2002 Specific down-modulation of Notch1 signaling in cervical cancer cells is required for sustained HPV-E6/E7 expression and late steps of malignant transformation. *Genes Dev* 16:2252–2263
294. Talora C, Cialfi S, Segatto O, Morrone S, Kim Choi J, Frati L, Paolo Dotto G, Gulino A, Screpanti I 2005 Constitutively active Notch1 induces growth arrest of HPV-positive cervical cancer cells via separate signaling pathways. *Exp Cell Res* 305:343–354
295. Grego-Bessa J, Luna-Zurita L, del Monte G, Bolós V, Melgar P, Arandilla A, Garratt AN, Zang H, Mukouyama Y, Chen H, Shou W, Ballestar E, Esteller M, Rojas A, Pérez-Pomares JM, de la Pompa JL 2007 Notch signaling is essential for ventricular chamber development. *Dev Cell* 12:415–429
296. Jenni R, Oechslin E, Schneider J, Attenhofer Jost C, Kaufmann PA 2001 Echocardiographic and pathoanatomical characteristics of isolated left ventricular noncompaction: a step towards classification as a distinct cardiomyopathy. *Heart* 86:666–671
